# Supplementary material for: Highly enantioselective Michael addition reactions with new trimeric chiral phase transfer catalysts
Source: Royal Society of Chemistry journal article supplement (doi:10.1039/c4nj02395a), 2015-01-01
Supplement: c4nj02395a1.pdf [file c4nj02395a1.pdf]

*Supporting Information*

---

---

**Highly Enantioselective Michael Addition Reactions with New  
Trimeric Chiral Phase Transfer Catalysts**

Arockiam Jesin Beneto, Jayaraman Sivamani, Veeramanoharan Ashokkumar, Rajendiran Balasaravanan,  
Duraimurugan Kumaraguru and Ayyanar Siva \*

Department of Inorganic Chemistry, School of Chemistry, Madurai Kamaraj University,  
Madurai-625 021.

Corresponding authors : drasiva@gmail.com; ptesiva@yahoo.co.in

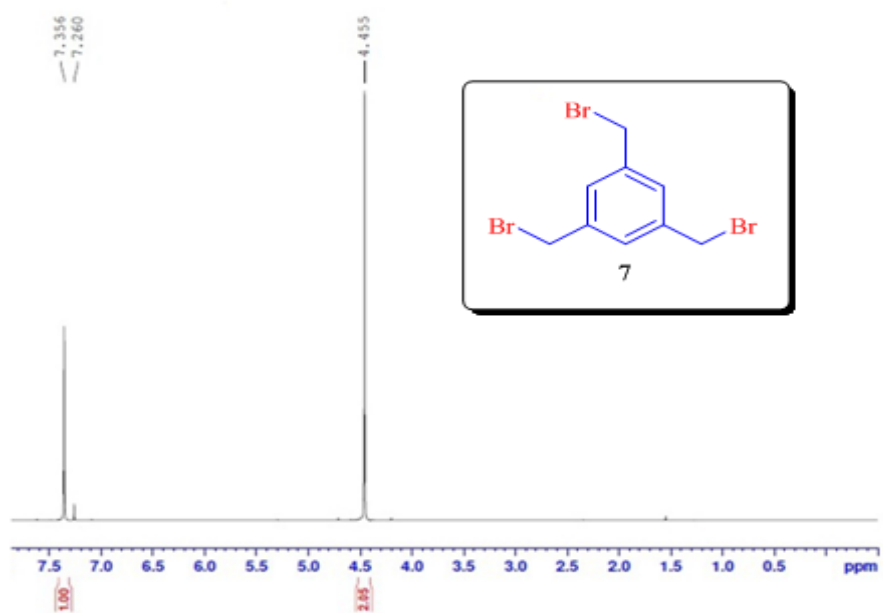

Figure S1. <sup>1</sup>H NMR Spectrum of 1, 3, 5-tribromomesitylene (7).

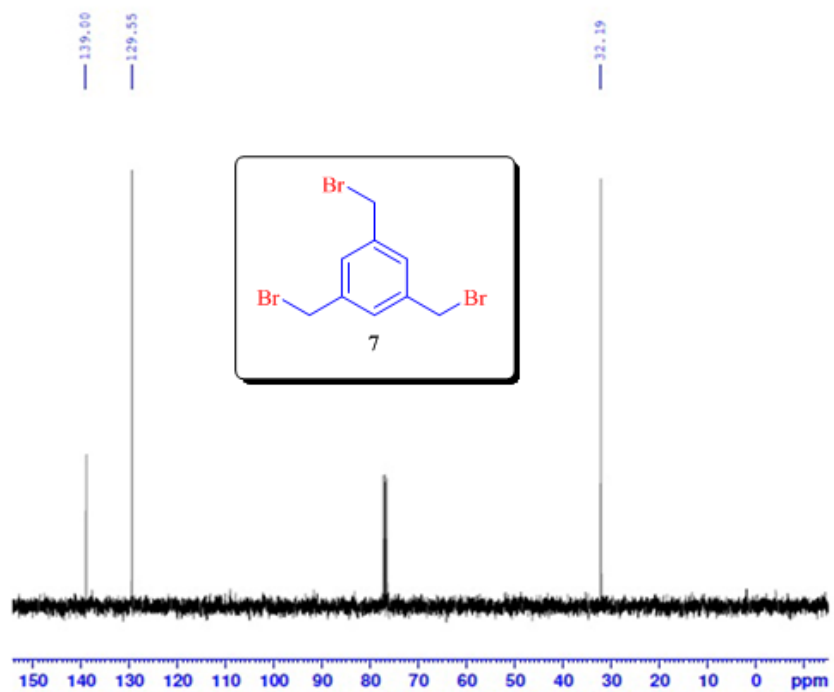

Figure S2. <sup>13</sup>C NMR Spectrum of 1, 3, 5-tribromomesitylene (7).

## Supporting Information

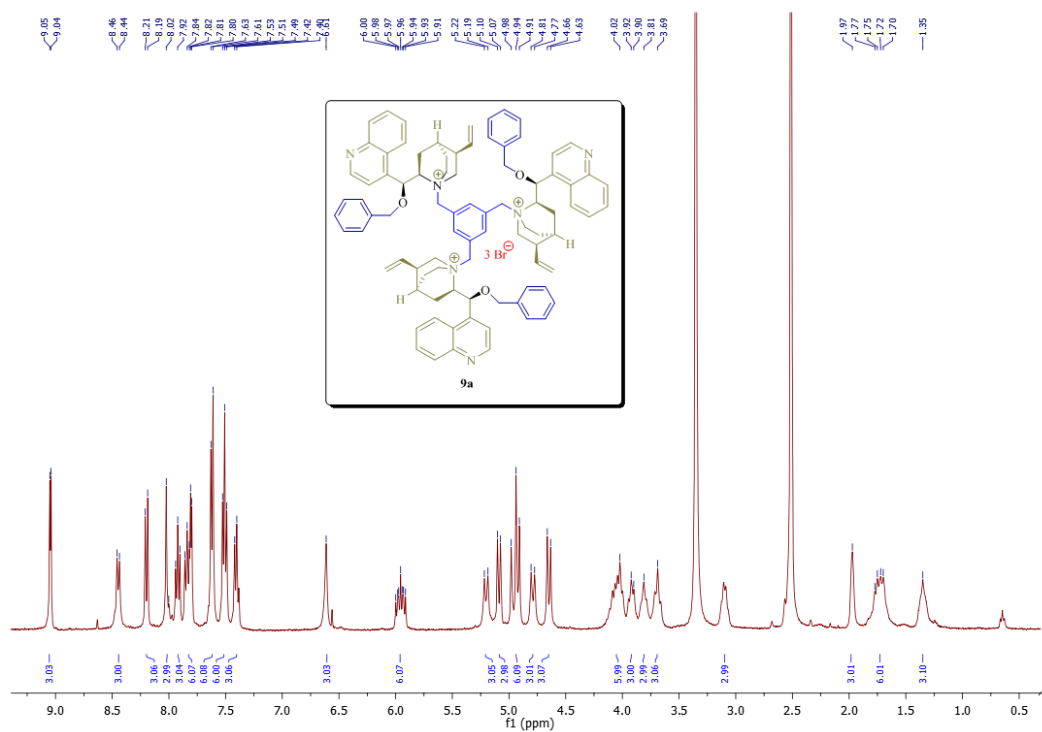

**Figure S3.  $^1\text{H}$  NMR Spectrum of Mesitylene based benzylcinchonine (9a).**

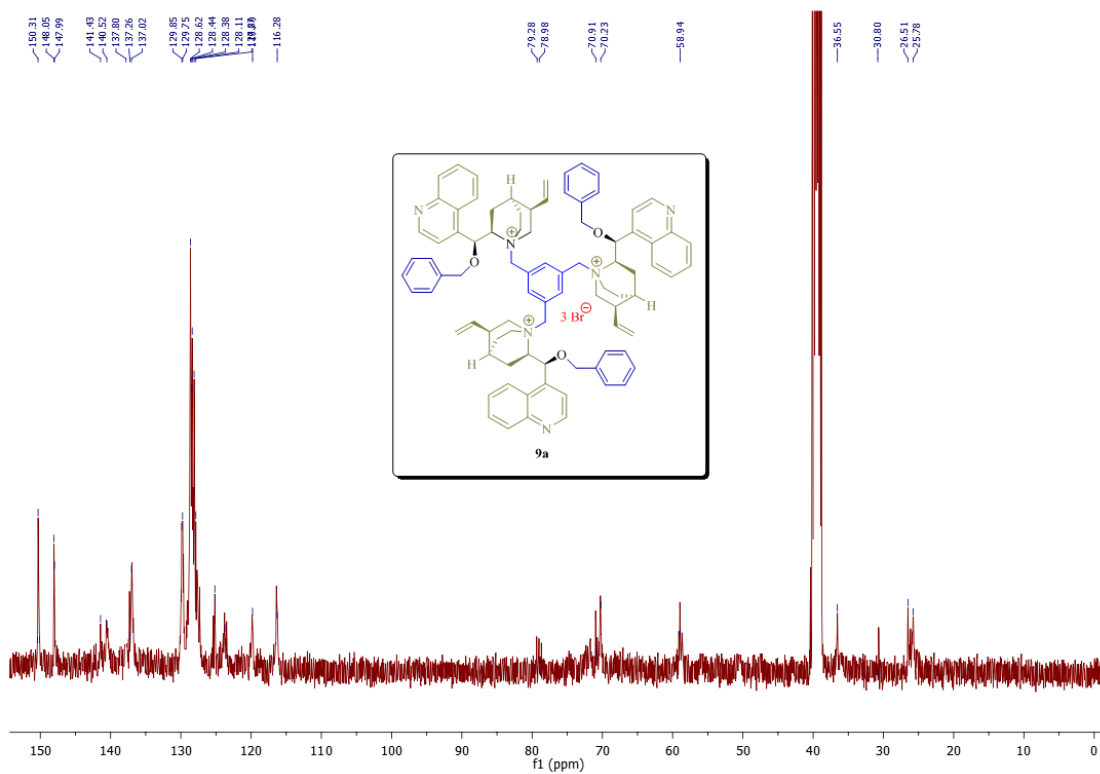

Figure S4.  $C^{13}$  NMR Spectrum of Mesitylene based benzylcinchonine (9a).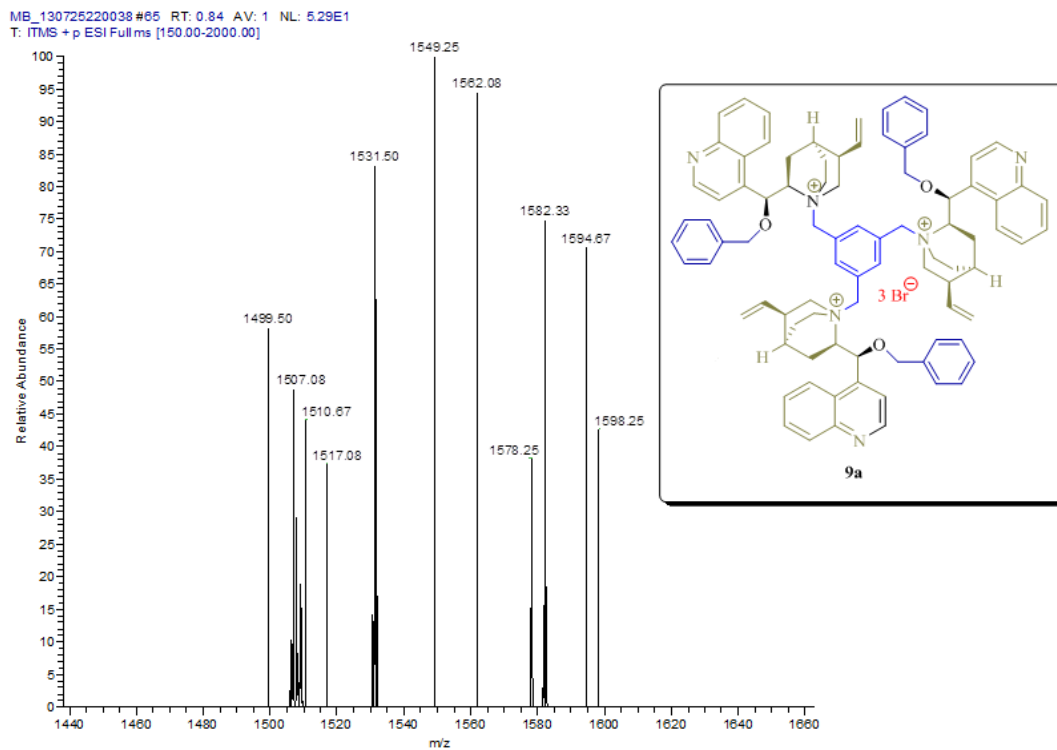

Figure S5. ESI - Mass Spectrum of Mesitylene based benzylcinchonine (9a).

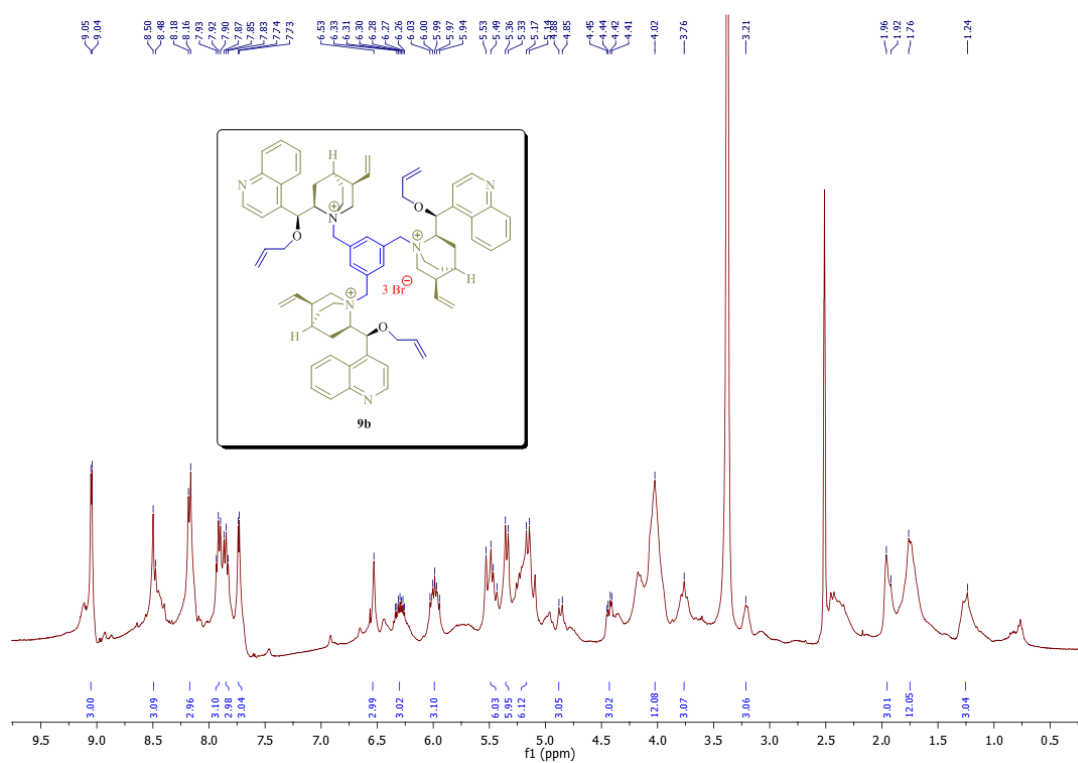

Figure S6.  $^1\text{H}$  NMR Spectrum of Mesitylene based allylcinchonine (9b).

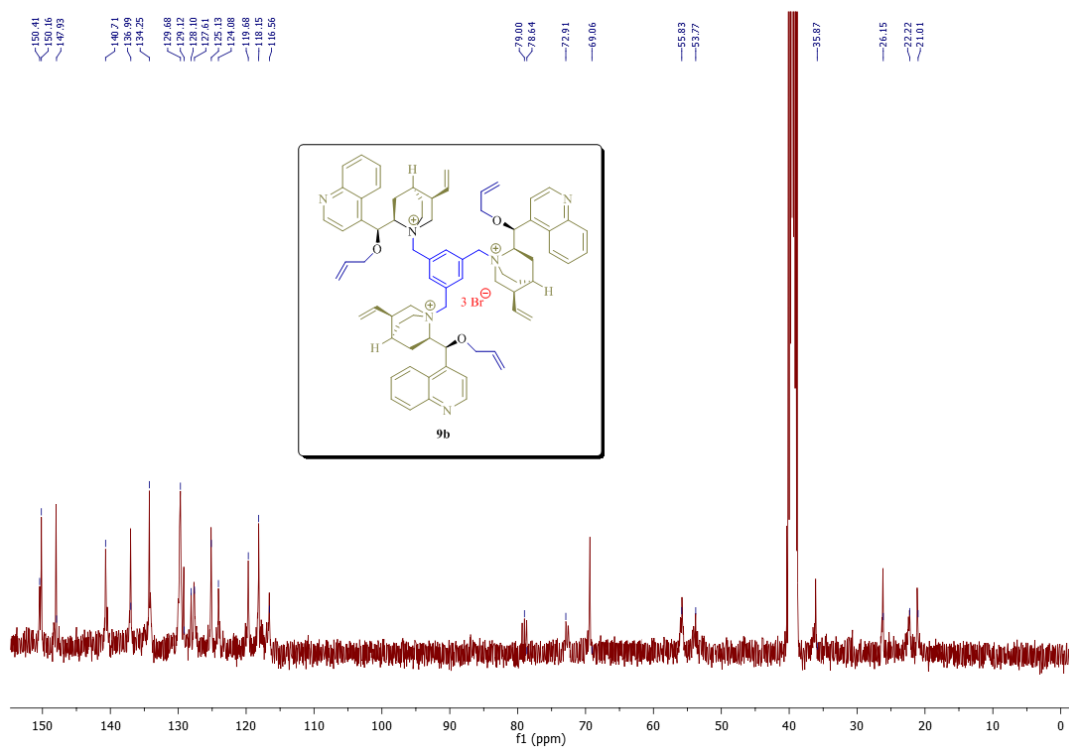

Figure S7.  $C^{13}$  NMR Spectrum of Mesitylene based allylcinchonine (9b).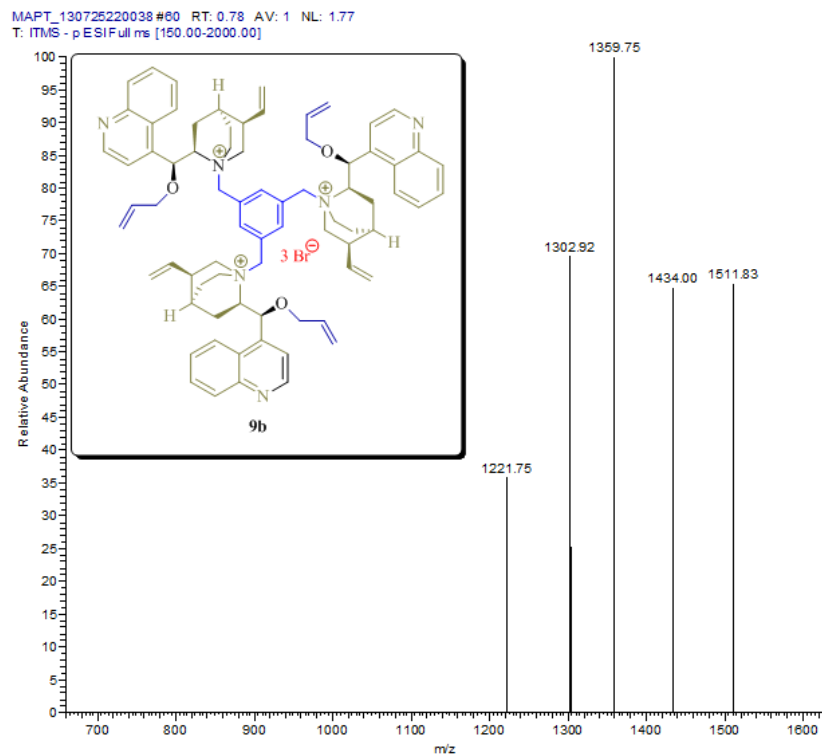

Figure S8. ESI - Mass Spectrum of Mesitylene based allylcinchonine (9b).

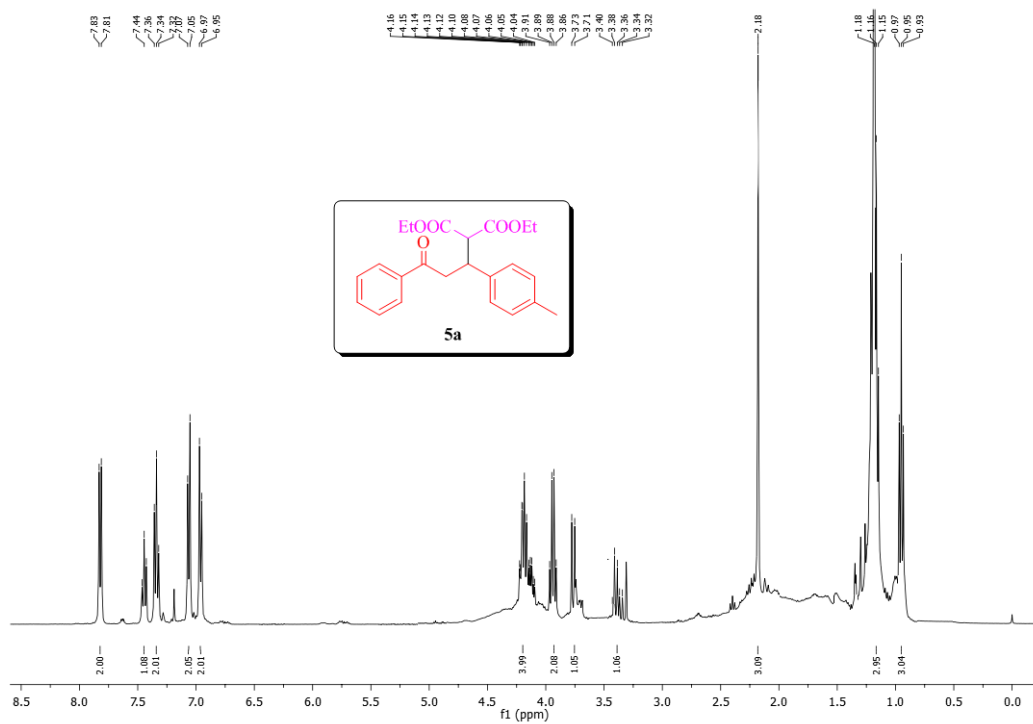

Figure S9.  $^1\text{H}$  NMR Spectrum of diethyl 2-(3-oxo-3-phenyl-1-*p*-tolylpropyl) malonate (5a).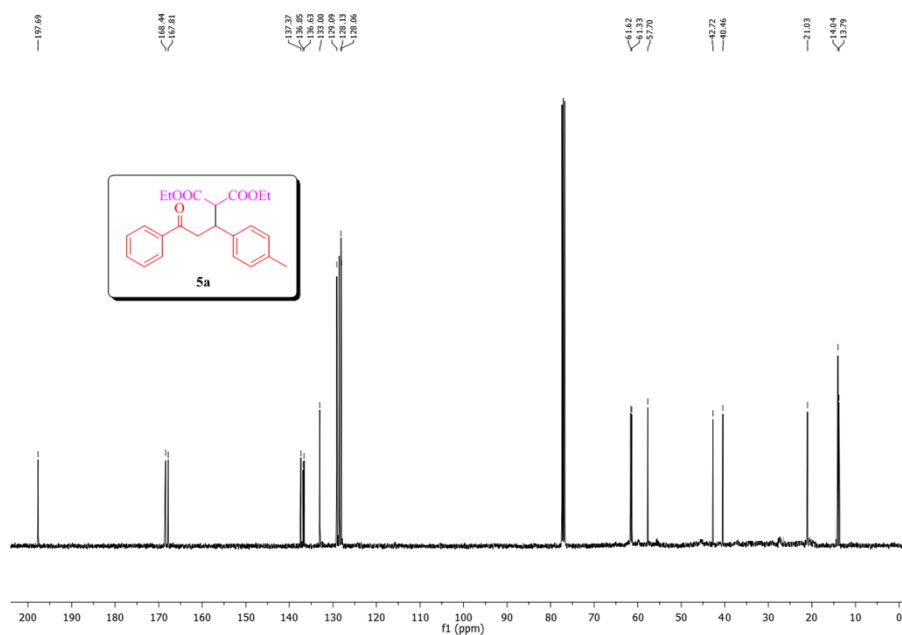Figure S10.  $^{13}\text{C}$  NMR Spectrum of diethyl 2-(3-oxo-3-phenyl-1-*p*-tolylpropyl) malonate (5a).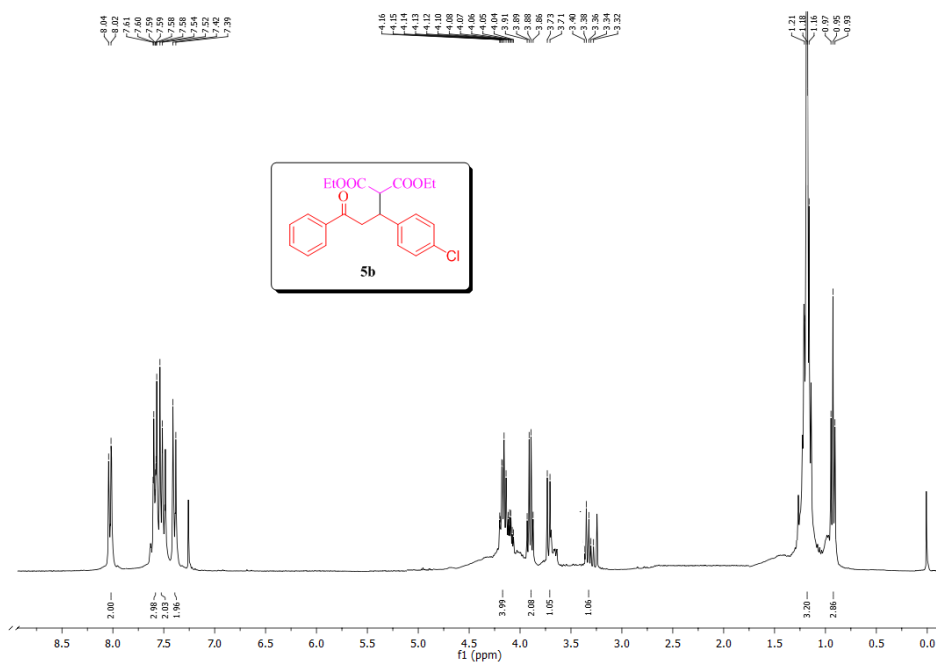

Figure S11.  $^1\text{H}$  NMR Spectrum of diethyl 2-(1-(4-chlorophenyl)-3-oxo-3-phenylpropyl)malonate (**5b**).

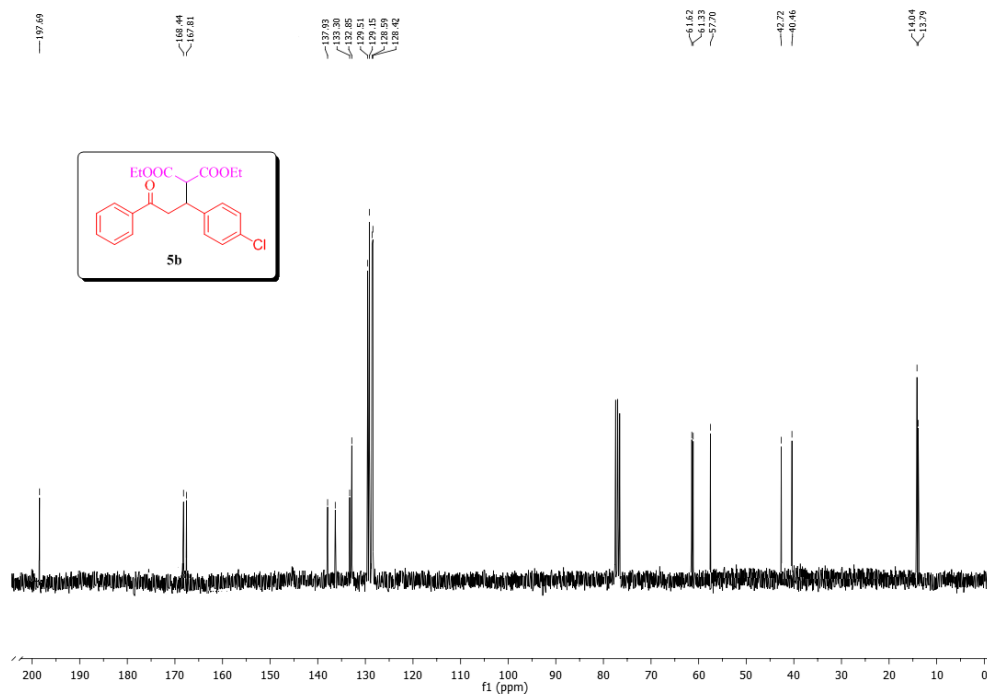

Figure S12.  $^{13}\text{C}$  NMR Spectrum of diethyl 2-(1-(4-chlorophenyl)-3-oxo-3-phenylpropyl)malonate (**5b**).

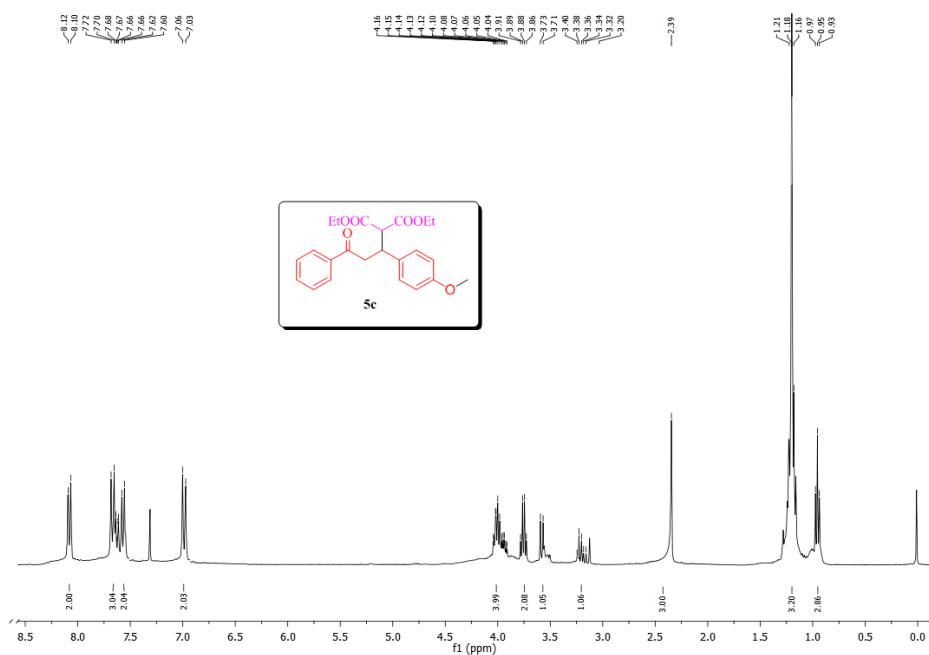



Figure S13.  $^1\text{H}$  NMR Spectrum of diethyl 2-(1-(4-methoxyphenyl)-3-oxo-3-phenylpropyl)malonate (5c).

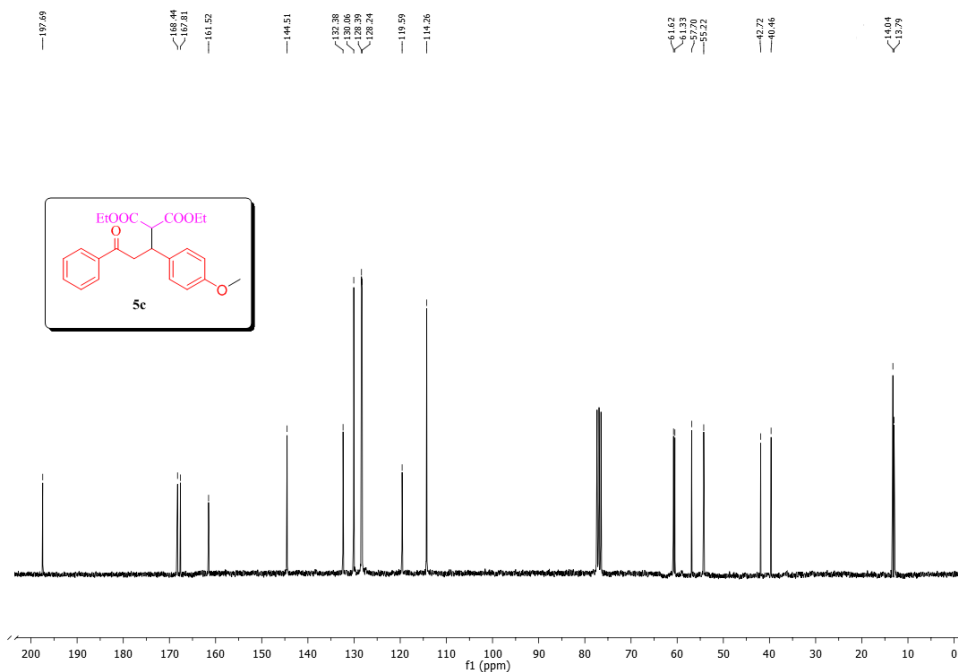

Figure S14.  $^{13}\text{C}$  NMR Spectrum of diethyl 2-(1-(4-nitrophenyl)-3-oxo-3-phenylpropyl)malonate (5d).

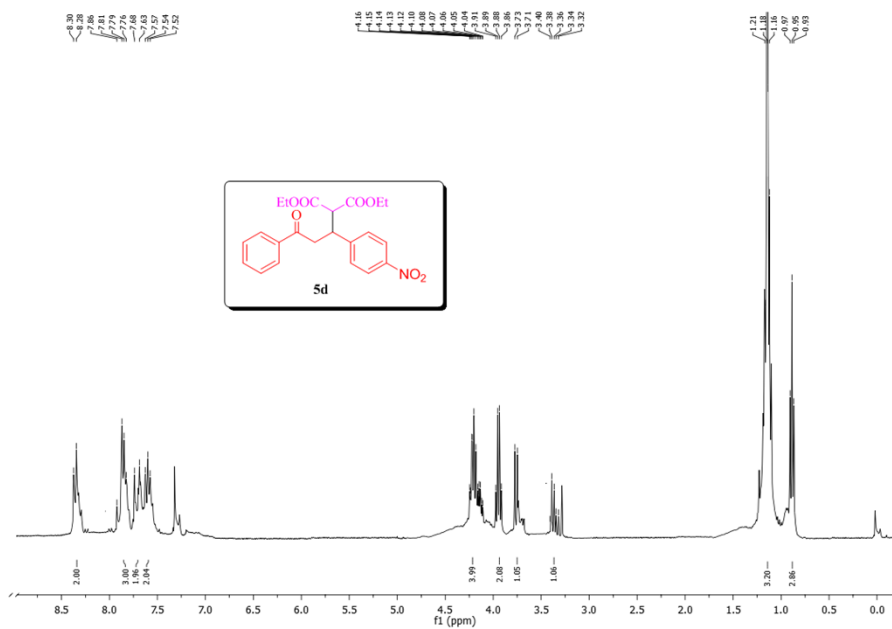

**Figure S15. <sup>1</sup>H NMR Spectrum of diethyl 2-(1-(4-nitrophenyl)-3-oxo-3-phenylpropyl)malonate (5d).**

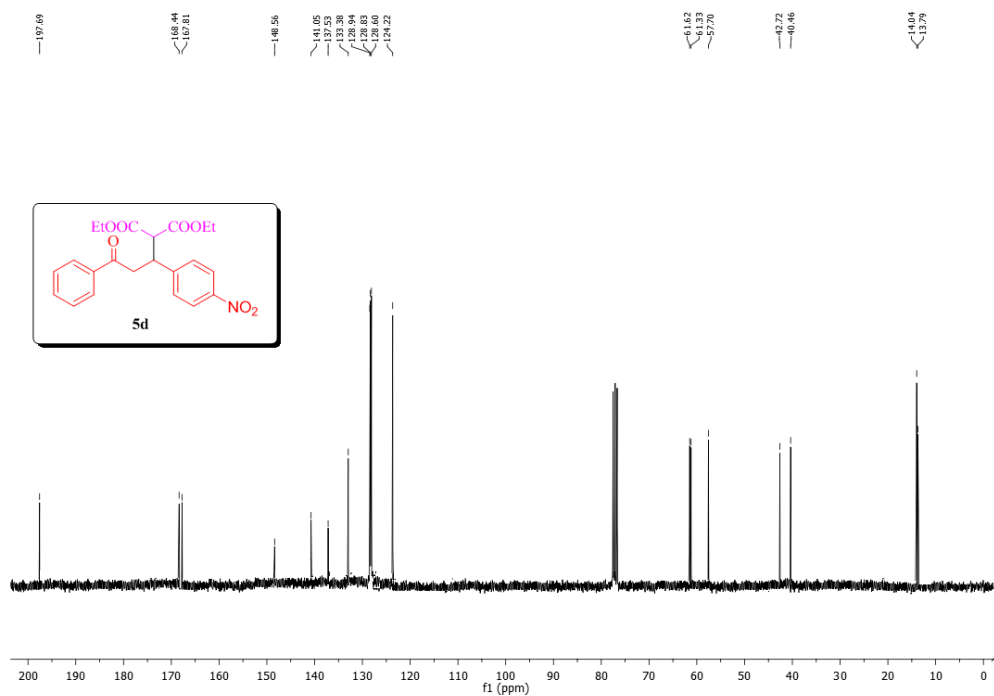

**Figure S16. <sup>13</sup>C NMR Spectrum of diethyl 2-(1-(4-nitrophenyl)-3-oxo-3-phenylpropyl)malonate (5d).**

## Supporting Information

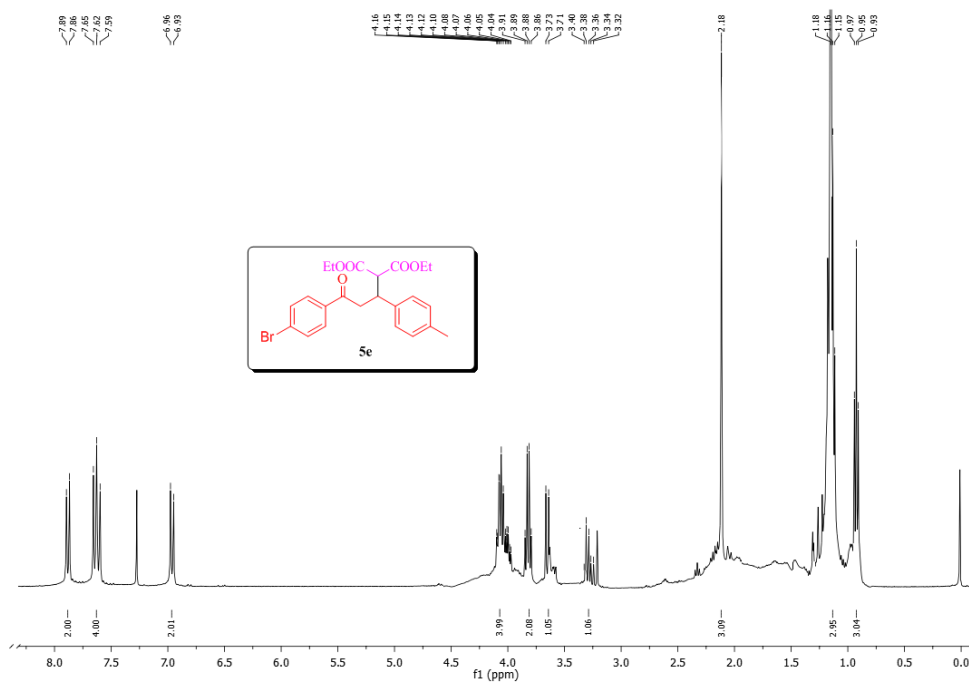

**Figure S17. <sup>1</sup>H NMR Spectrum of diethyl 2-(3-(4-bromophenyl)-3-oxo-1-*p*-tolylpropyl)malonate (5e).**

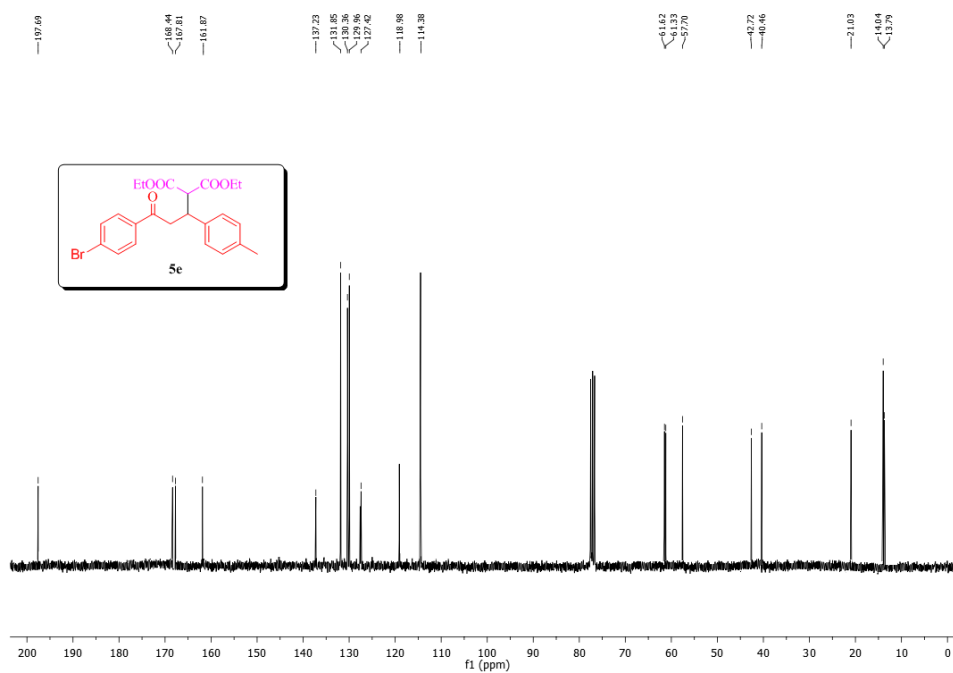

Figure S18.  $^{13}\text{C}$  NMR Spectrum of diethyl 2-(3-(4-bromophenyl)-3-oxo-1-*p*-tolylpropyl)malonate (5e).

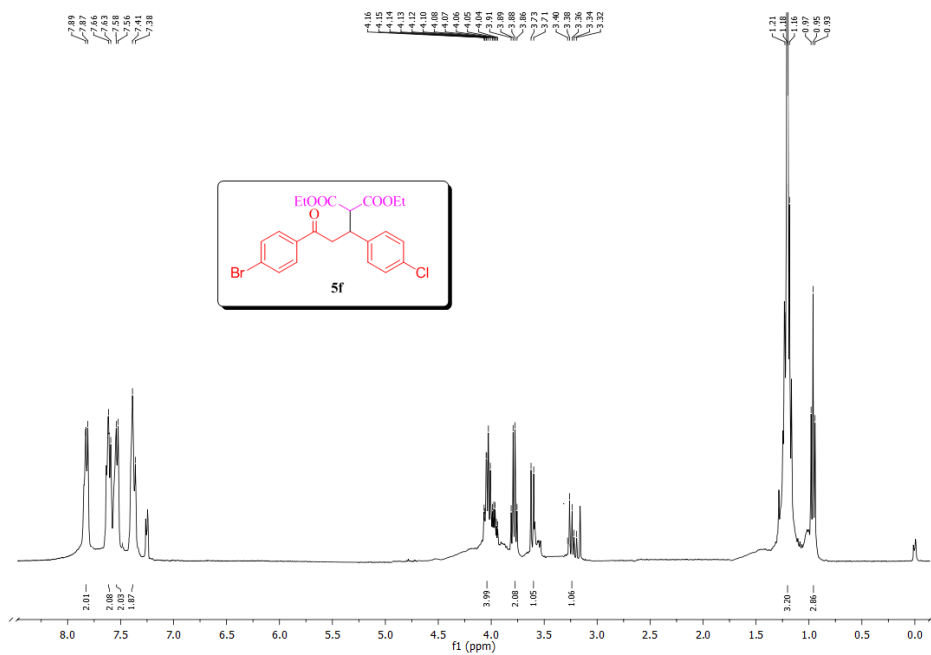

Figure S19.  $^1\text{H}$  NMR Spectrum of diethyl 2-(3-(4-bromophenyl)-1-(4-chlorophenyl)-3-oxopropyl)malonate (5f).

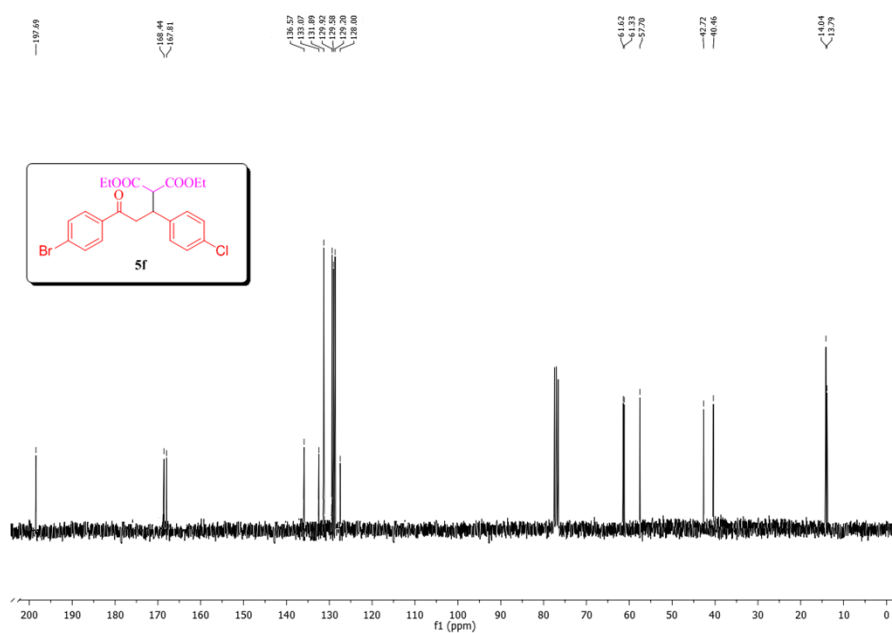

Figure S20.  $^{13}\text{C}$  NMR Spectrum of diethyl 2-(3-(4-bromophenyl)-1-(4-chlorophenyl)-3-oxopropyl)malonate (5f).

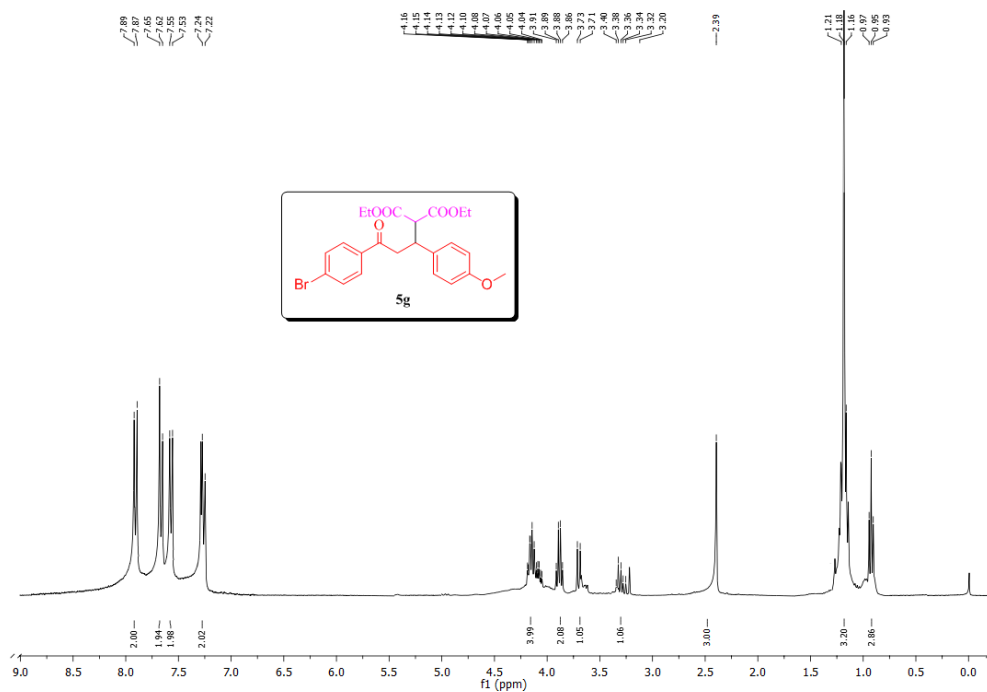

Figure S21.  $^1\text{H}$  NMR Spectrum of diethyl 2-(3-(4-bromophenyl)-1-(4-methoxyphenyl)-3-oxopropyl)malonate (5g).

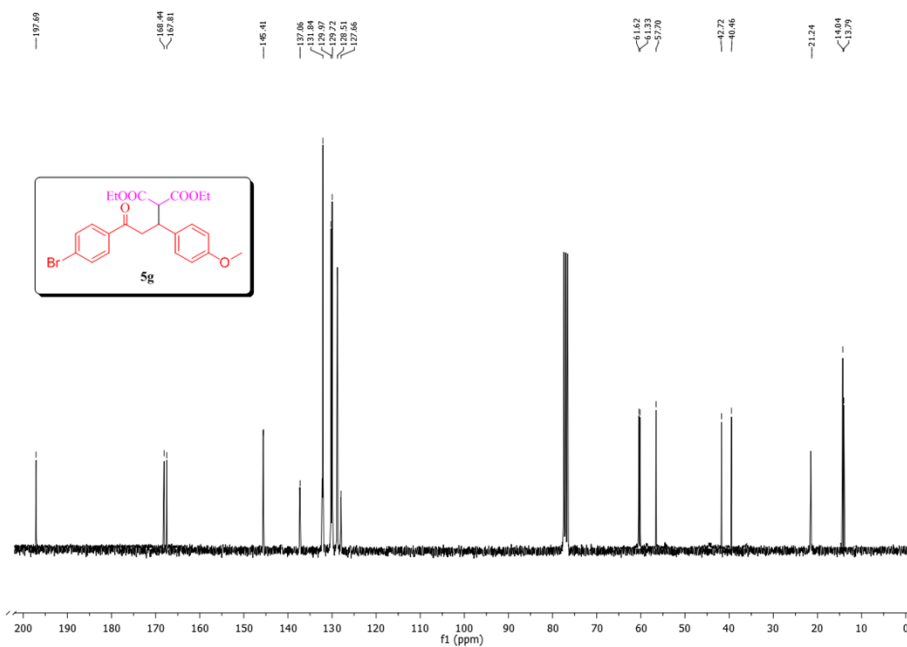

Figure S22.  $^{13}\text{C}$  NMR Spectrum of diethyl 2-(3-(4-bromophenyl)-1-(4-methoxyphenyl)-3-oxopropyl)malonate (5g).

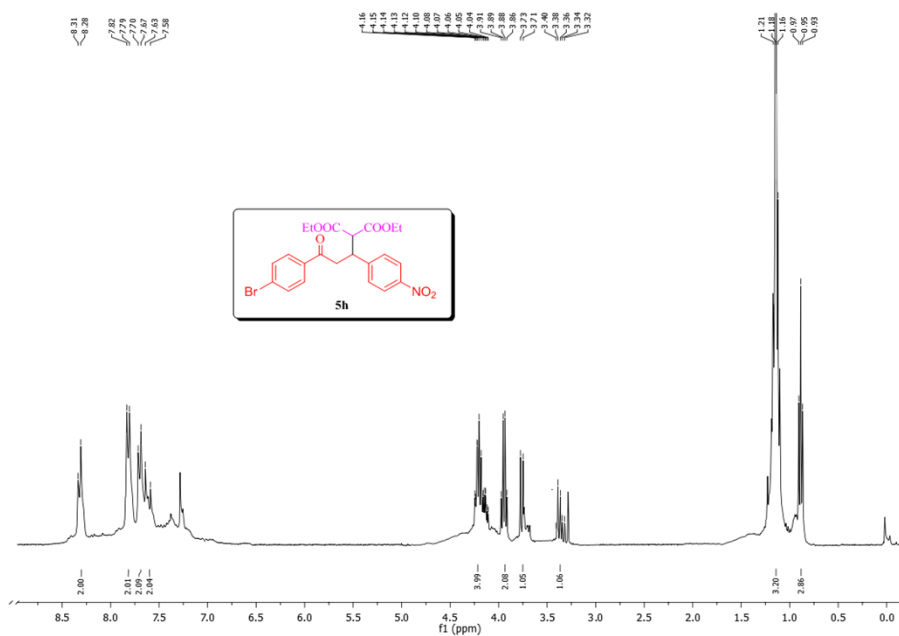

Figure S23.  $^1\text{H}$  NMR Spectrum of diethyl 2-(3-(4-bromophenyl)-1-(4-nitrophenyl)-3-oxopropyl)malonate (5h).

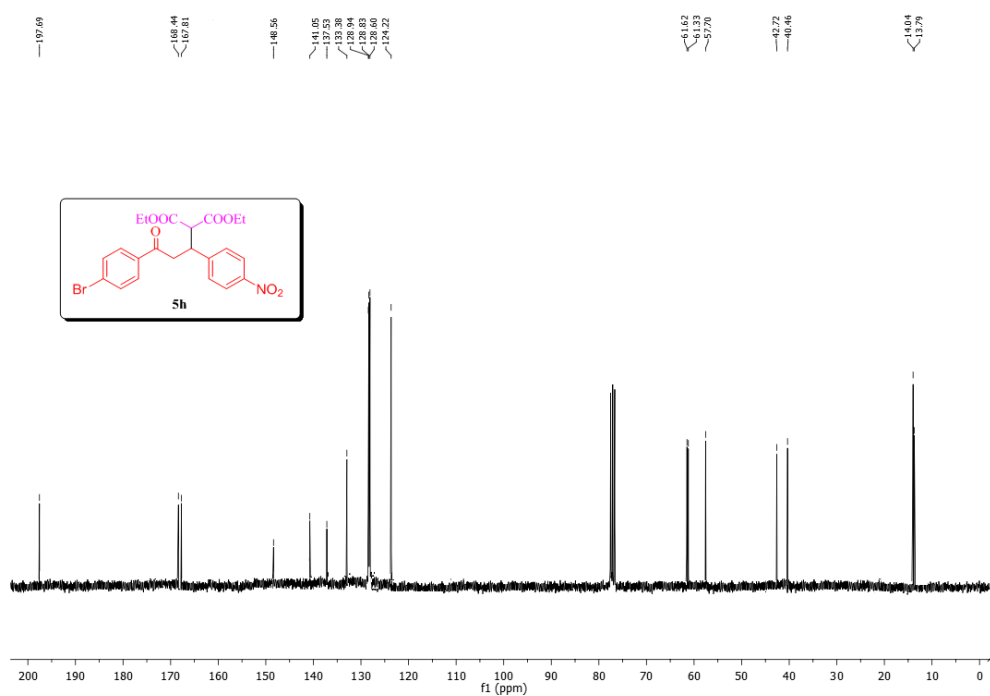

Figure S24.  $^{13}\text{C}$  NMR Spectrum of diethyl 2-(3-(4-bromophenyl)-1-(4-nitrophenyl)-3-oxopropyl)malonate (5h).

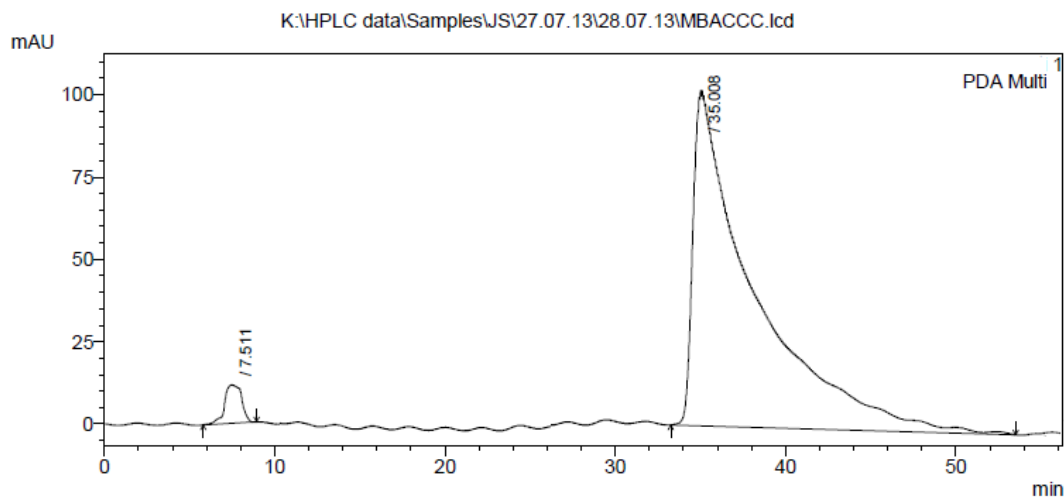

PeakTable

PDA Ch1 254nm 4nm

| Name | Peak# | Ret. Time | Area     | Height | Area %  | Height % |
|------|-------|-----------|----------|--------|---------|----------|
|      | 1     | 7.511     | 802355   | 11645  | 3.107   | 10.267   |
|      | 2     | 35.008    | 25024294 | 101775 | 96.893  | 89.733   |
|      | Total |           | 25826649 | 113420 | 100.000 | 100.000  |

Figure S25. HPLC spectrum of Michael Adduct (5a) in presence of CMPTC (9a) and Toluene/ $\text{K}_2\text{CO}_3$  condition.

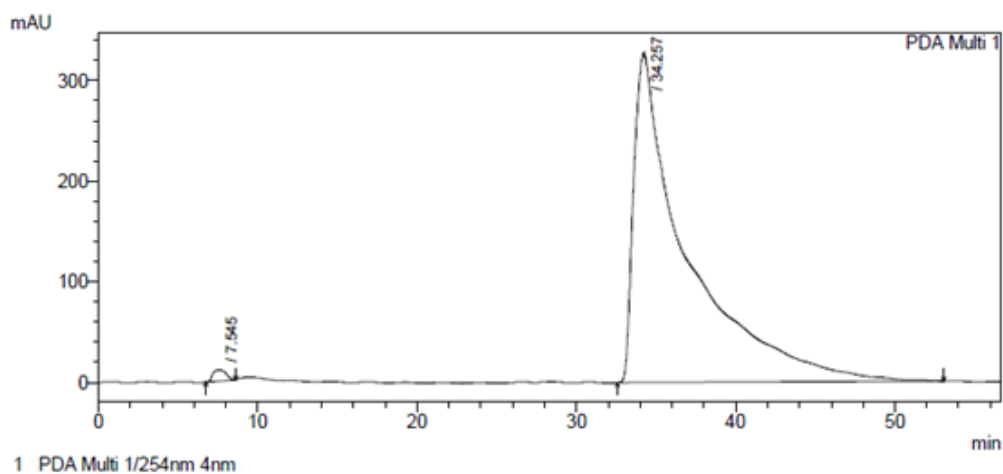

PeakTable

PDA Ch1 254nm 4nm

| Name | Peak# | Ret. Time | Area     | Height | Area %  | Height % |
|------|-------|-----------|----------|--------|---------|----------|
|      | 1     | 7.545     | 638607   | 10978  | 0.834   | 3.228    |
|      | 2     | 34.257    | 75973037 | 329078 | 99.166  | 96.772   |
|      | Total |           | 76611645 | 340056 | 100.000 | 100.000  |

Figure S26. HPLC spectrum of Michael Adduct (5a) in presence of CMPTC (9b) and Toluene/K<sub>2</sub>CO<sub>3</sub> condition.

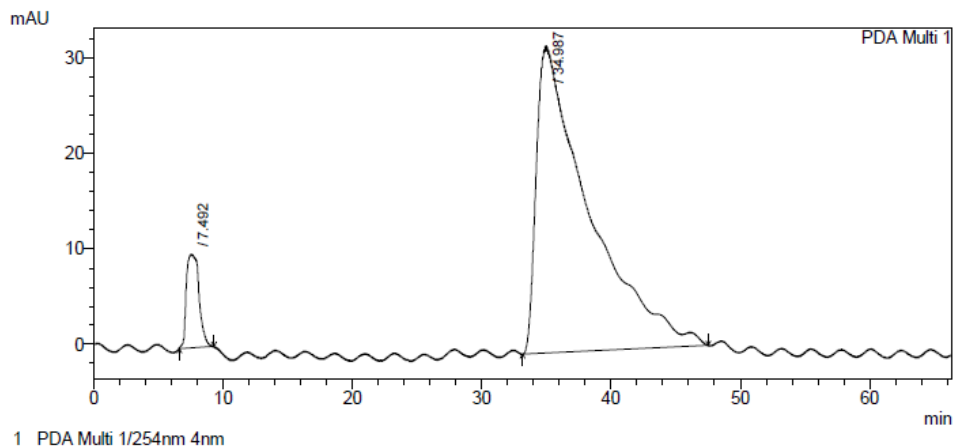

PeakTable

| Name | Peak# | Ret. Time | Area    | Height | Area %  | Height % |
|------|-------|-----------|---------|--------|---------|----------|
|      | 1     | 7.492     | 660684  | 9806   | 6.790   | 23.376   |
|      | 2     | 34.987    | 9070046 | 32142  | 93.210  | 76.624   |
|      | Total |           | 9730730 | 41948  | 100.000 | 100.000  |

Figure S27. HPLC spectrum of Michael Adduct (5a) in presence of CMPTC (9a) and Toluene/Cs<sub>2</sub>CO<sub>3</sub> condition.

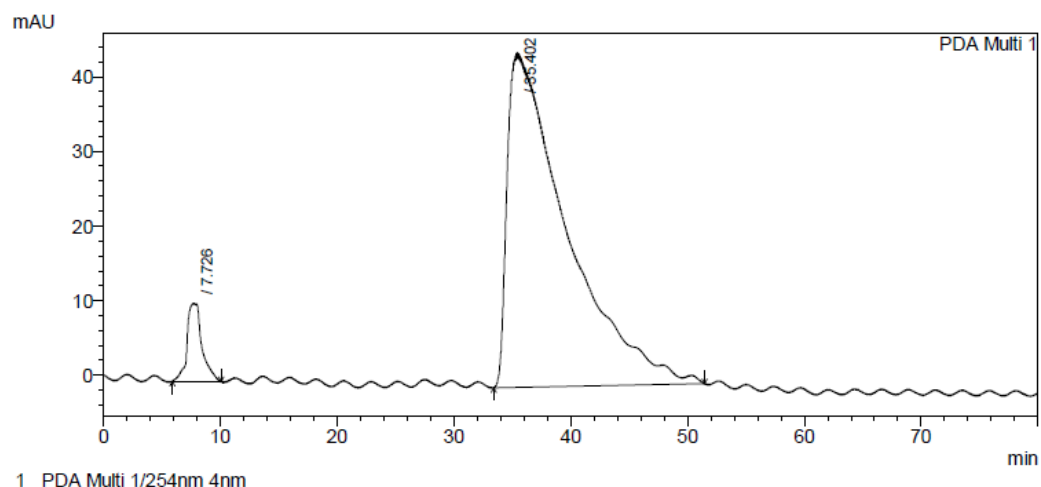

PeakTable

| Name | Peak# | Ret. Time | Area     | Height | Area %  | Height % |
|------|-------|-----------|----------|--------|---------|----------|
|      | 1     | 7.726     | 921963   | 10464  | 5.501   | 18.895   |
|      | 2     | 35.402    | 15838988 | 44918  | 94.499  | 81.105   |
|      | Total |           | 16760951 | 55382  | 100.000 | 100.000  |



Figure S28. HPLC spectrum of Michael Adduct (5a) in presence of CMPTC (9b) and Toluene/Cs<sub>2</sub>CO<sub>3</sub> condition.

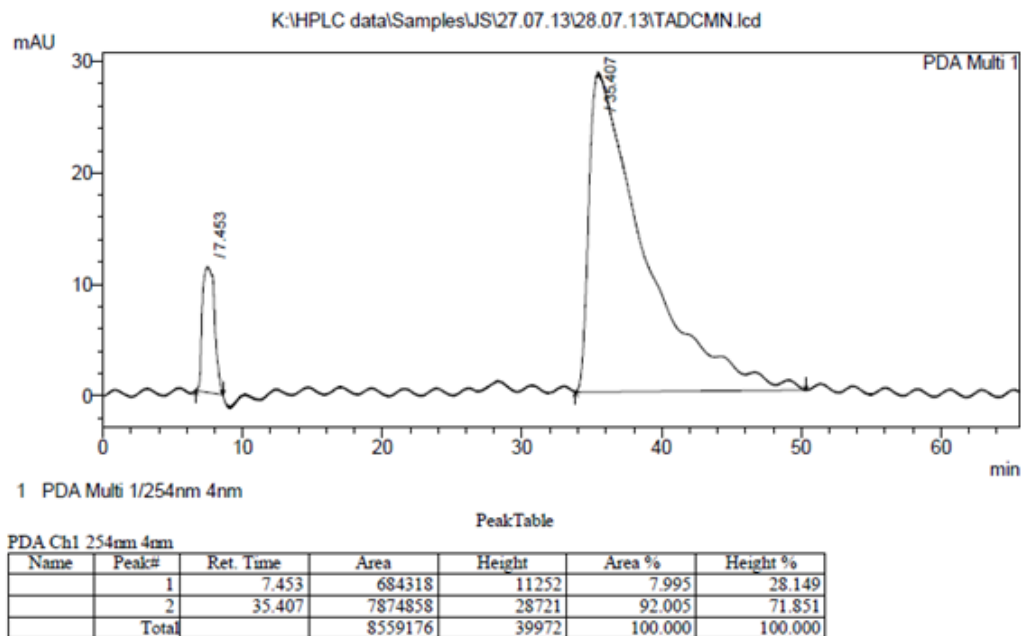

Figure S29. HPLC spectrum of Michael Adduct (5a) in presence of CMPTC (9a) and Toluene/NaOH condition.

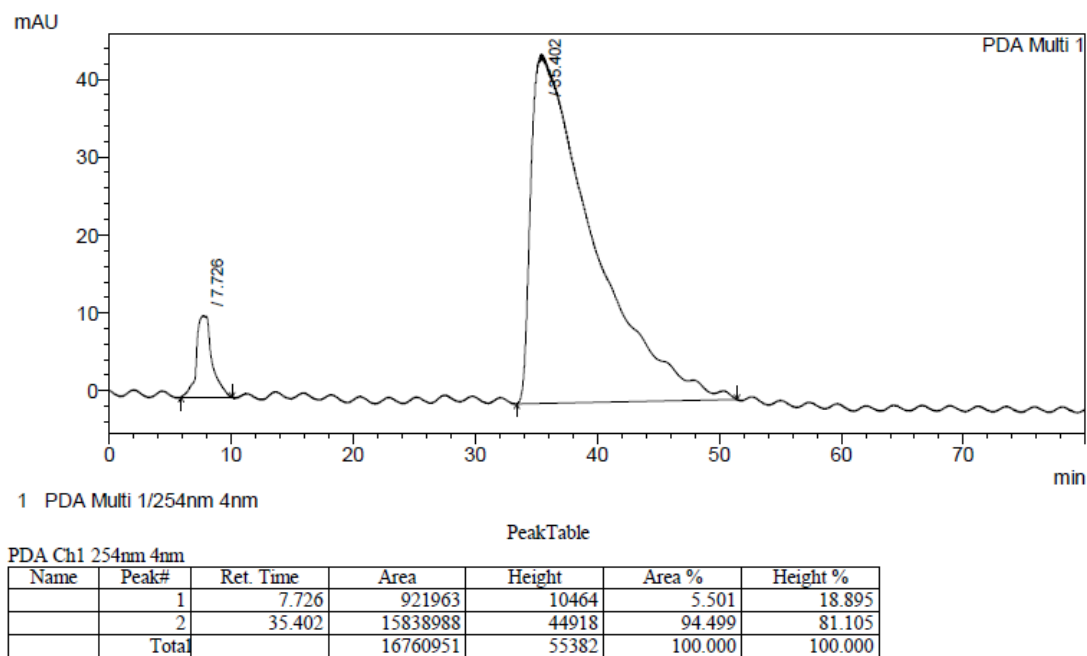

Figure S30. HPLC spectrum of Michael Adduct (5a) in presence of CMPTC (9b) and Toluene/NaOH condition.

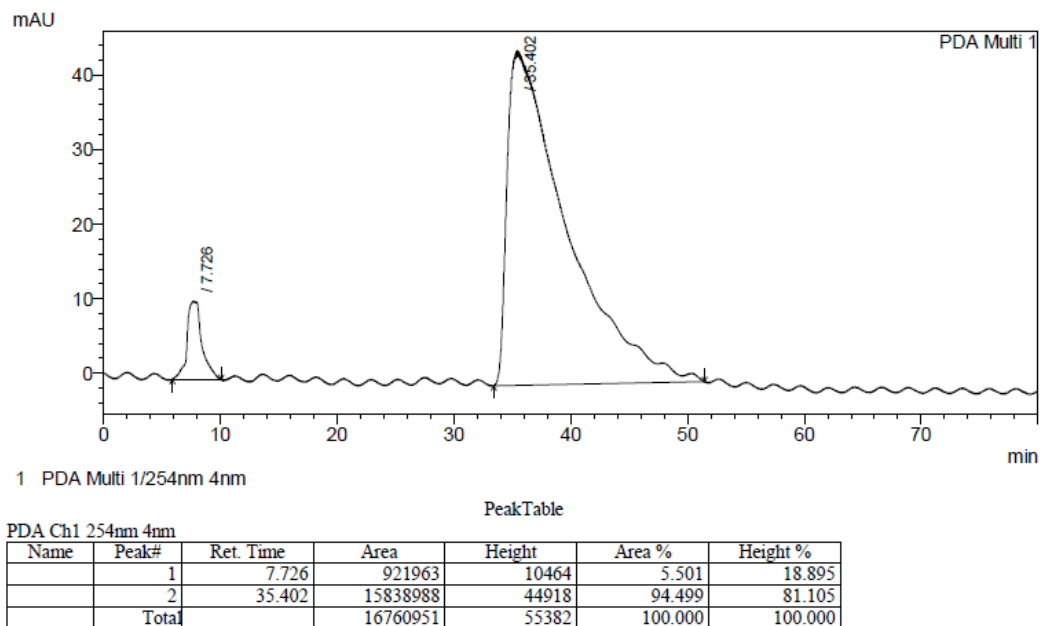

Figure S31. HPLC spectrum of Michael Adduct (5a) in presence of CMPTC (9a) and Toluene/KOH condition.

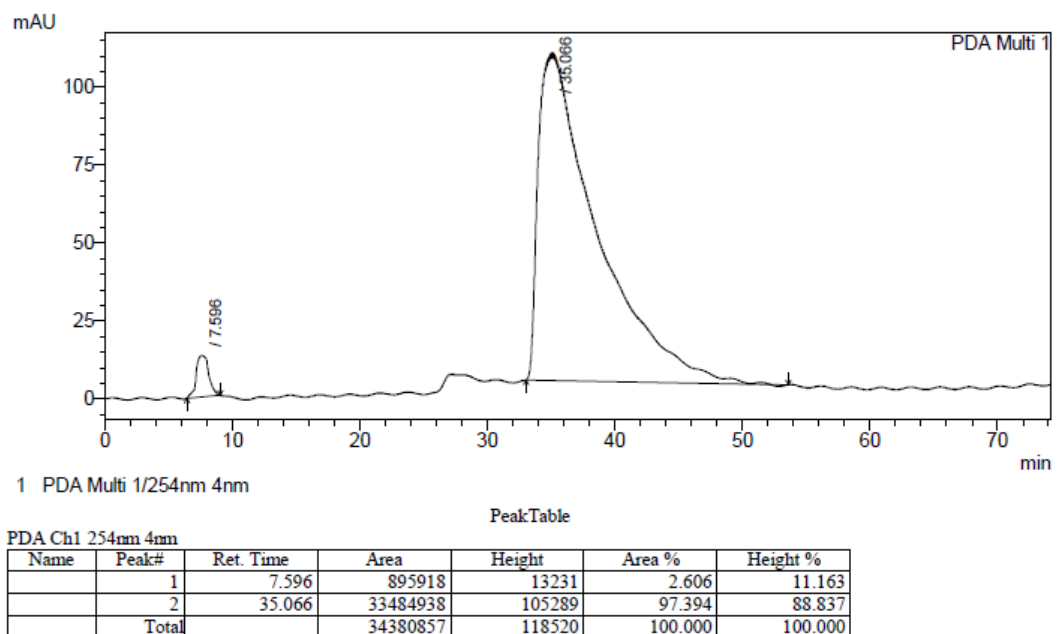

Figure S32. HPLC spectrum of Michael Adduct (5a) in presence of CMPTC (9b) and Toluene/KOH condition.

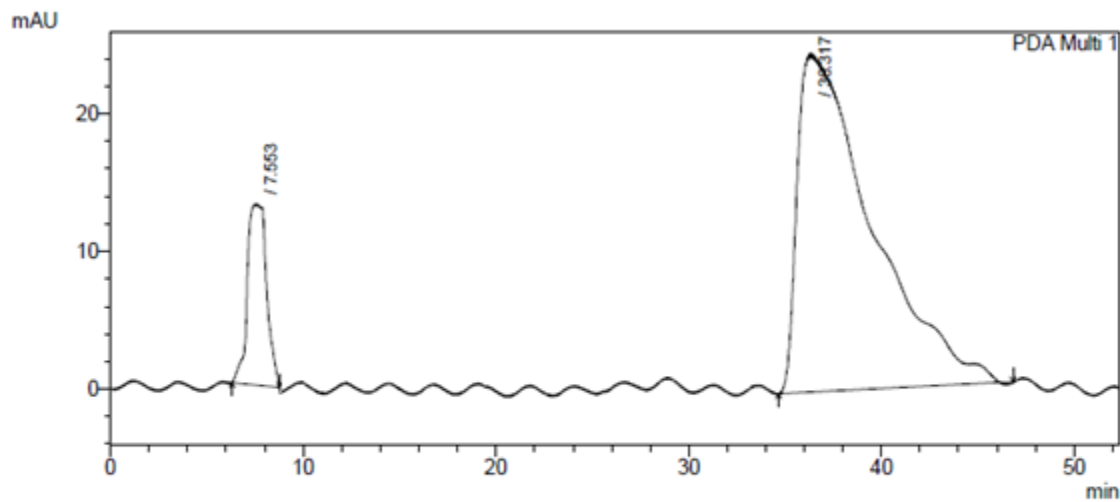

PDA Ch1 254nm 4nm

PeakTable

| Name | Peak# | Ret. Time | Area    | Height | Area %  | Height % |
|------|-------|-----------|---------|--------|---------|----------|
|      | 1     | 7.553     | 912668  | 13193  | 12.179  | 34.863   |
|      | 2     | 36.317    | 6580894 | 24651  | 87.821  | 65.137   |
|      | Total |           | 7493562 | 37844  | 100.000 | 100.000  |

Figure S33. HPLC spectrum of Michael Adduct (5a) in presence of CMPTC (9a) and Toluene/K<sup>t</sup>OBu condition.

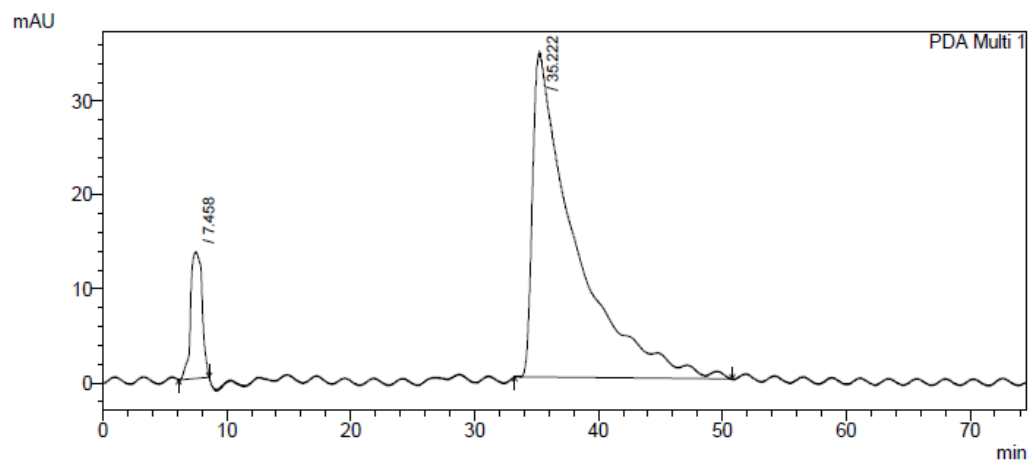

PDA Ch1 254nm 4nm

PeakTable

| Name | Peak# | Ret. Time | Area    | Height | Area %  | Height % |
|------|-------|-----------|---------|--------|---------|----------|
|      | 1     | 7.458     | 859206  | 13478  | 9.480   | 27.959   |
|      | 2     | 35.222    | 8204394 | 34730  | 90.520  | 72.041   |
|      | Total |           | 9063600 | 48208  | 100.000 | 100.000  |

Figure S34. HPLC spectrum of Michael Adduct (5a) in presence of CMPTC (9b) and Toluene/K<sup>t</sup>OBU condition.

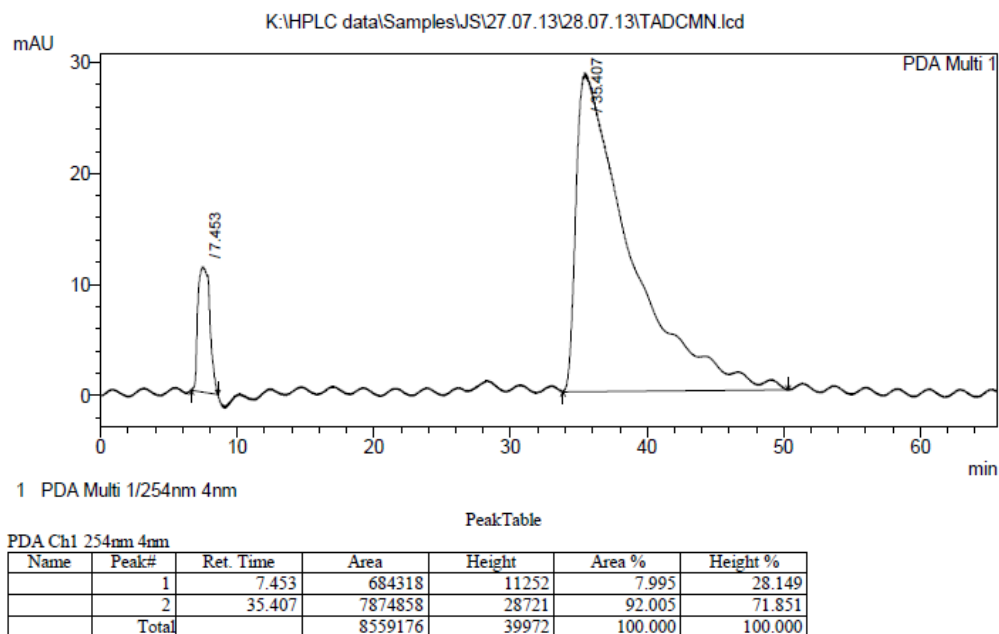

Figure S35. HPLC spectrum of Michael Adduct (5a) in presence of CMPTC (9a) and Cyclohexane/K<sub>2</sub>CO<sub>3</sub> condition.

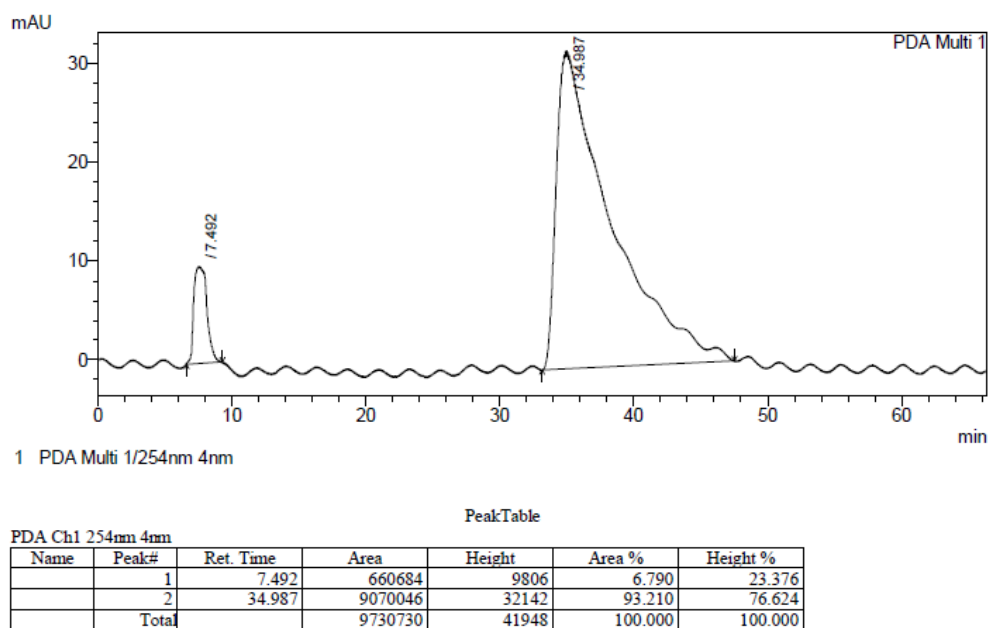

Figure S36. HPLC spectrum of Michael Adduct (5a) in presence of CMPTC (9b) and Cyclohexane/K<sub>2</sub>CO<sub>3</sub> condition.

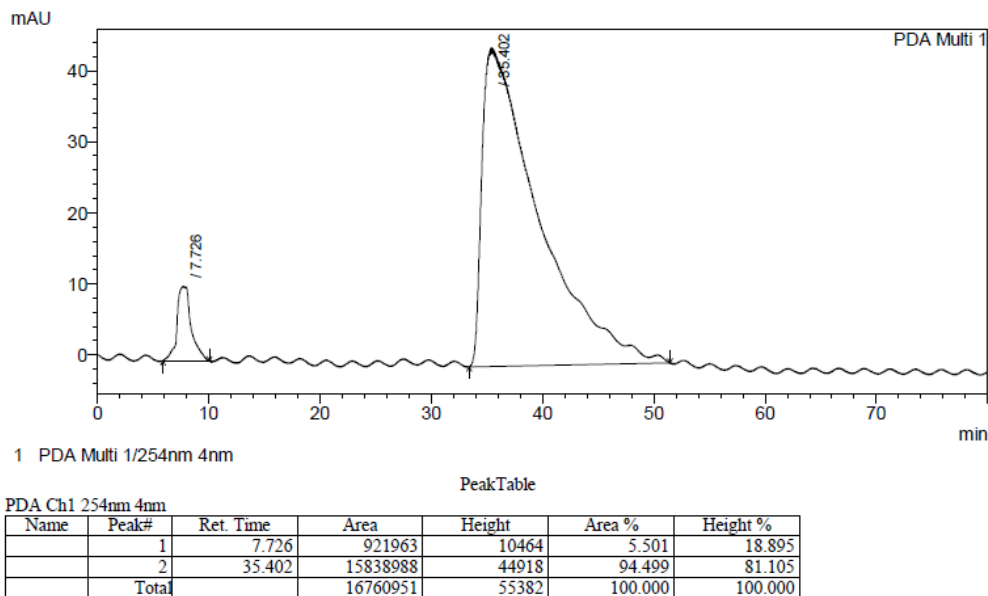

Figure S37. HPLC spectrum of Michael Adduct (5a) in presence of CMPTC (9a) and THF/K<sub>2</sub>CO<sub>3</sub> condition.

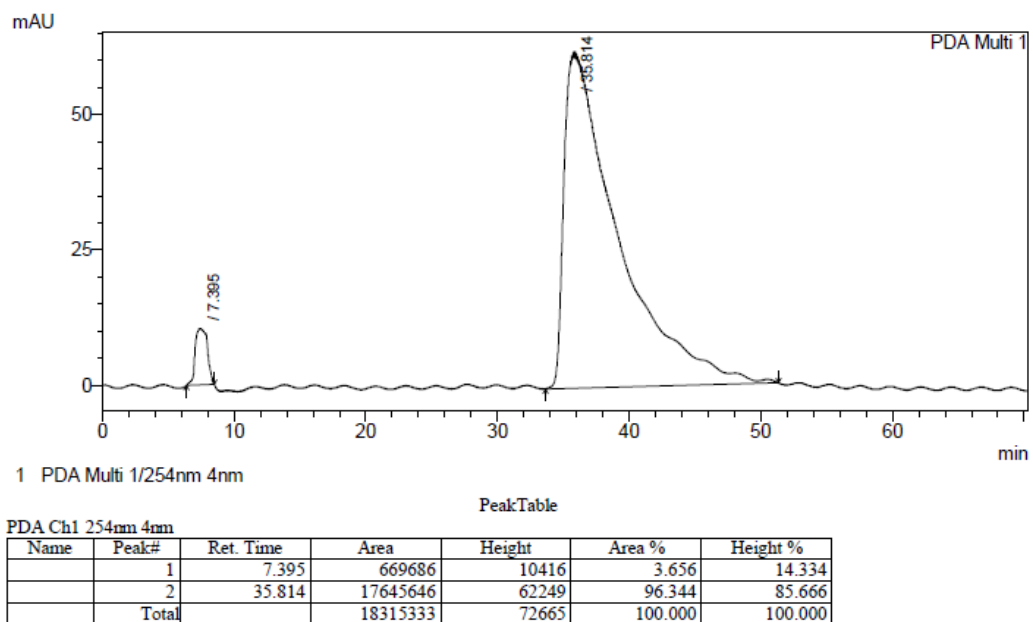

Figure S38. HPLC spectrum of Michael Adduct (5a) in presence of CMPTC (9b) and THF/K<sub>2</sub>CO<sub>3</sub> condition.

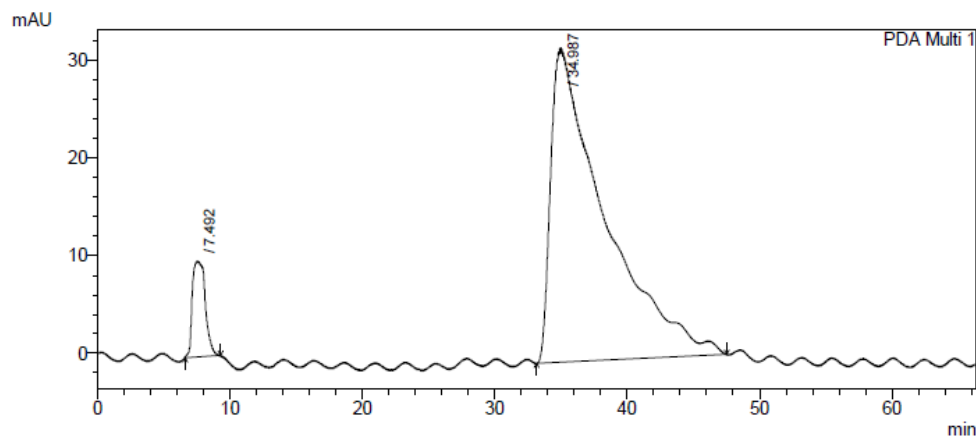

PeakTable

| Name | Peak# | Ret. Time | Area    | Height | Area %  | Height % |
|------|-------|-----------|---------|--------|---------|----------|
|      | 1     | 7.492     | 660684  | 9806   | 6.790   | 23.376   |
|      | 2     | 34.987    | 9070046 | 32142  | 93.210  | 76.624   |
|      | Total |           | 9730730 | 41948  | 100.000 | 100.000  |

Figure S39. HPLC spectrum of Michael Adduct (5a) in presence of CMPTC (9a) and ACN/K<sub>2</sub>CO<sub>3</sub> condition.

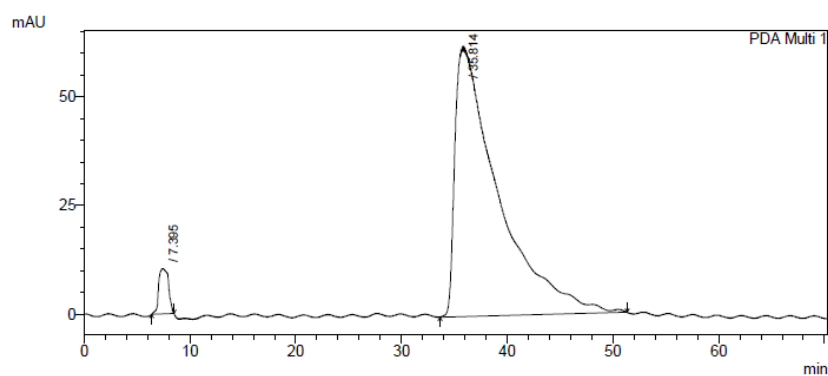

PeakTable

| Name | Peak# | Ret. Time | Area     | Height | Area %  | Height % |
|------|-------|-----------|----------|--------|---------|----------|
|      | 1     | 7.395     | 669686   | 10416  | 3.656   | 14.334   |
|      | 2     | 35.814    | 17645646 | 62249  | 96.344  | 85.666   |
|      | Total |           | 18315333 | 72665  | 100.000 | 100.000  |

Figure S40. HPLC spectrum of Michael Adduct (5a) in presence of CMPTC (9b) and ACN/K<sub>2</sub>CO<sub>3</sub> condition.

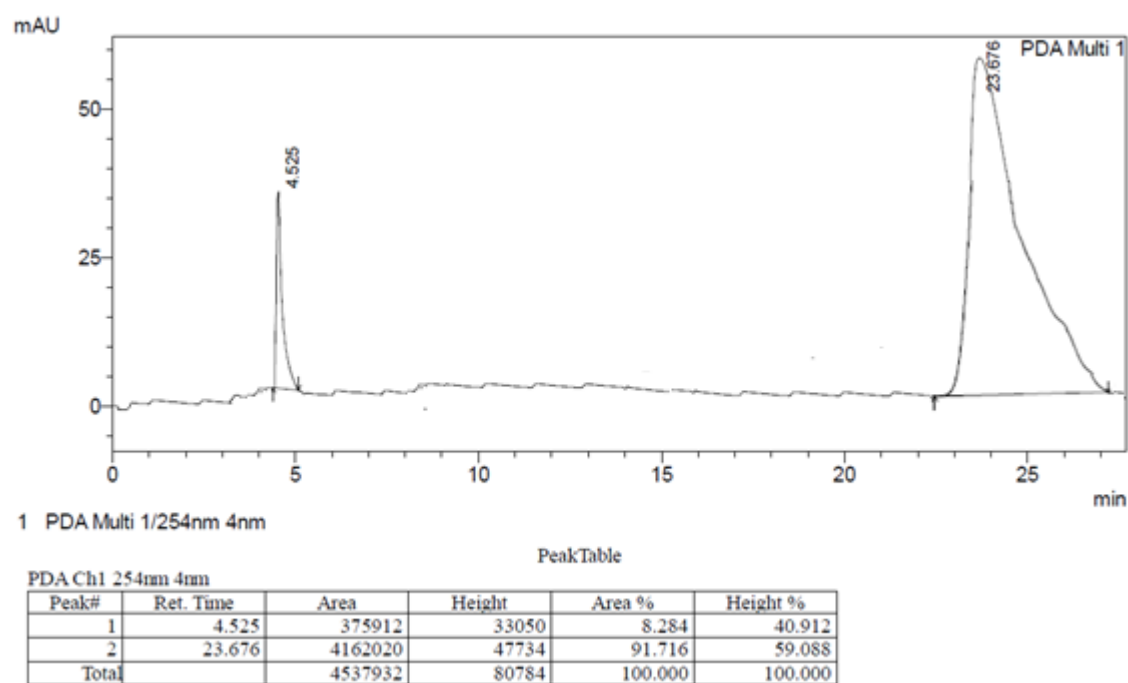

Figure S41. HPLC spectrum of Michael Adduct (5b) in presence of CMPTC (9a) and Toluene/K<sub>2</sub>CO<sub>3</sub> condition.

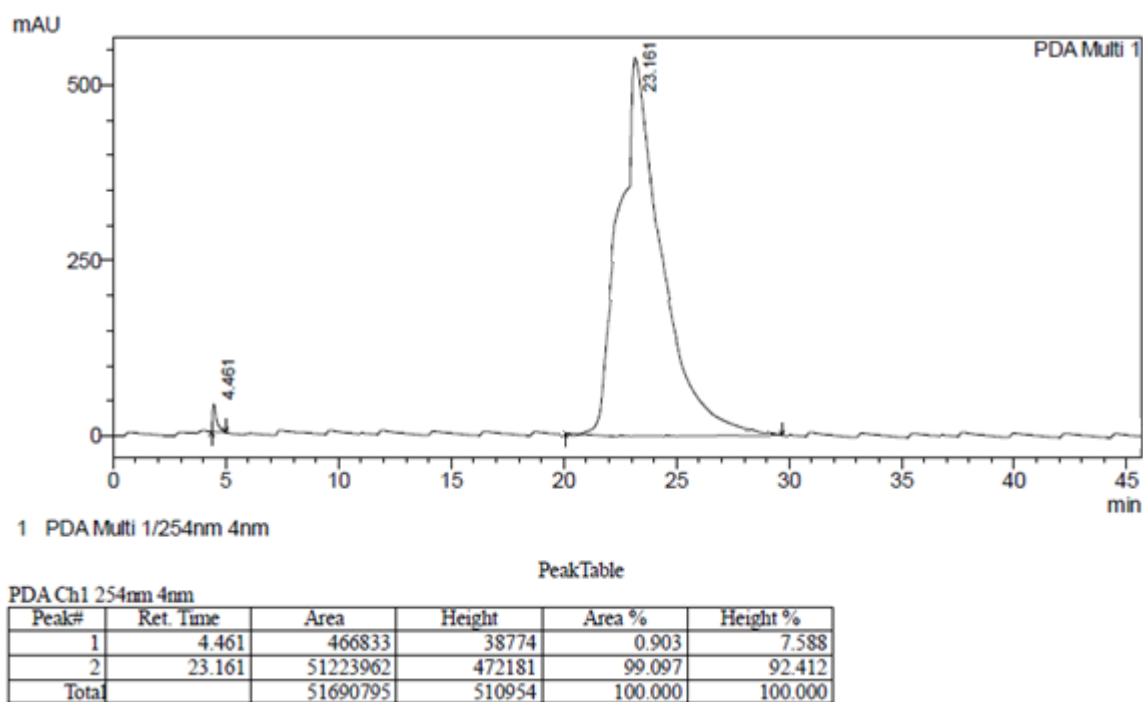

Figure S42. HPLC spectrum of Michael Adduct (5b) in presence of CMPTC (9b) and Toluene/K<sub>2</sub>CO<sub>3</sub> condition.

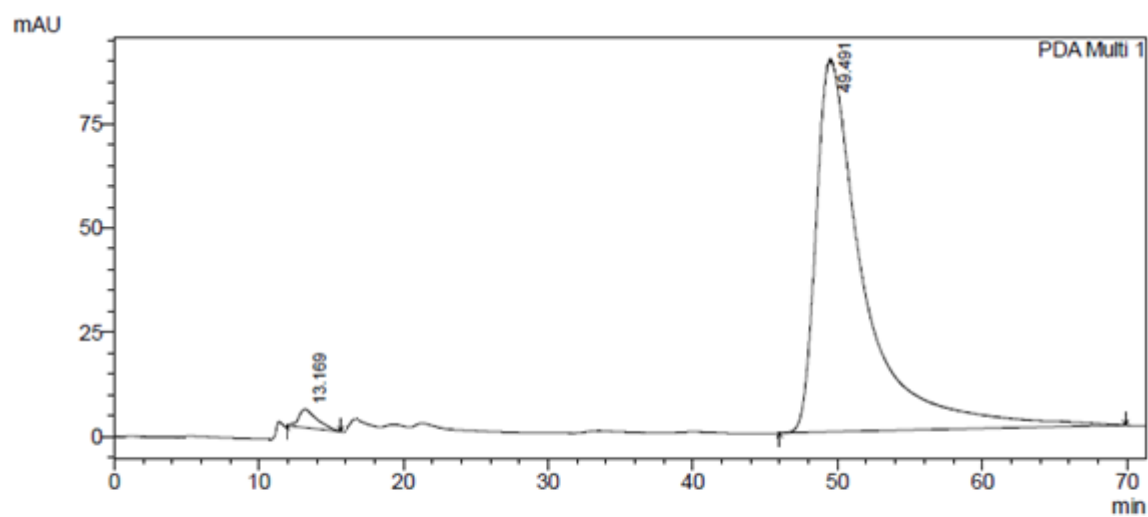

PeakTable

| Peak# | Ret. Time | Area     | Height | Area %  | Height % |
|-------|-----------|----------|--------|---------|----------|
| 1     | 13.169    | 391597   | 4333   | 1.857   | 4.614    |
| 2     | 49.491    | 20696094 | 89569  | 98.143  | 95.386   |
| Total |           | 21087691 | 93902  | 100.000 | 100.000  |

Figure S43. HPLC spectrum of Michael Adduct (5c) in presence of CMPTC (9a) and Toluene/ $K_2CO_3$  condition.

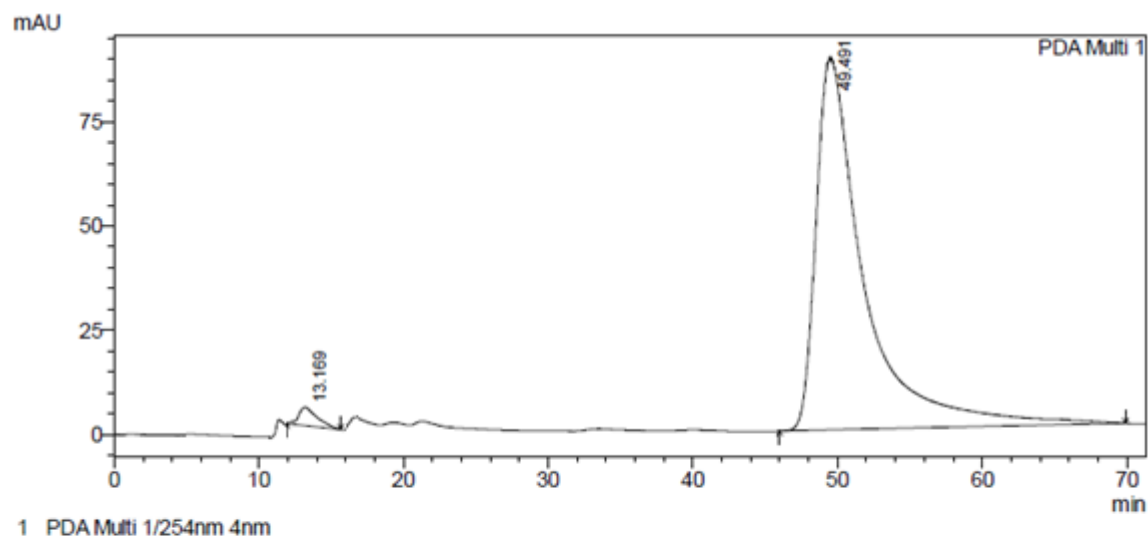

PeakTable

| Peak# | Ret. Time | Area     | Height | Area %  | Height % |
|-------|-----------|----------|--------|---------|----------|
| 1     | 13.169    | 391597   | 4333   | 1.857   | 4.614    |
| 2     | 49.491    | 20696094 | 89569  | 98.143  | 95.386   |
| Total |           | 21087691 | 93902  | 100.000 | 100.000  |

Figure S44. HPLC spectrum of Michael Adduct (5c) in presence of CMPTC (9b) and Toluene/ $K_2CO_3$  condition.



## Supporting Information

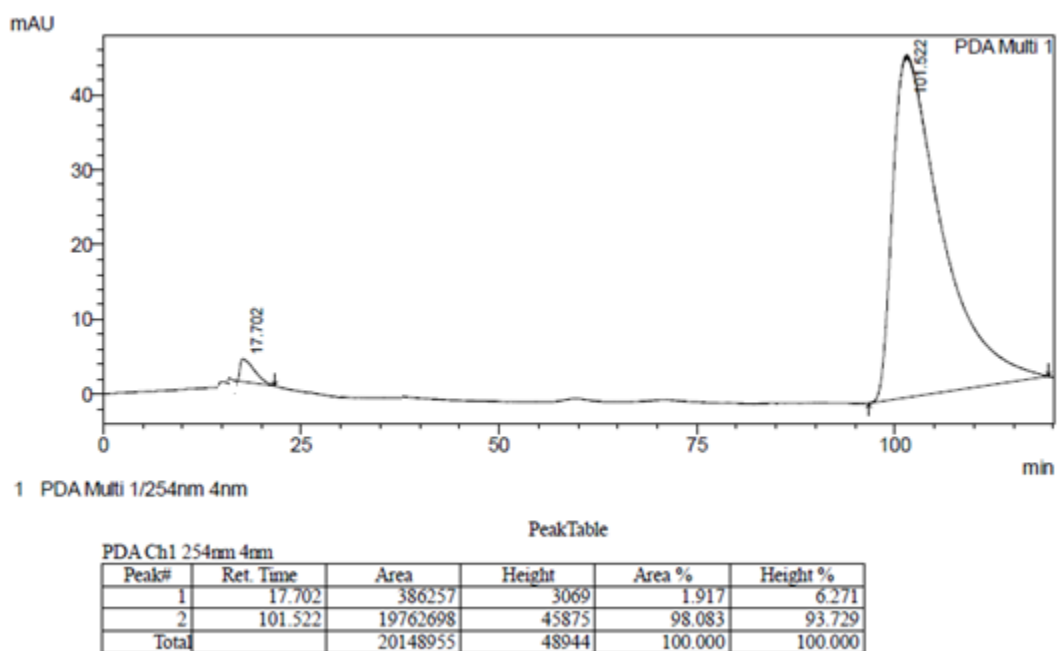

Figure S45. HPLC spectrum of Michael Adduct (5d) in presence of CMPTC (9a) and Toluene/K<sub>2</sub>CO<sub>3</sub> condition.

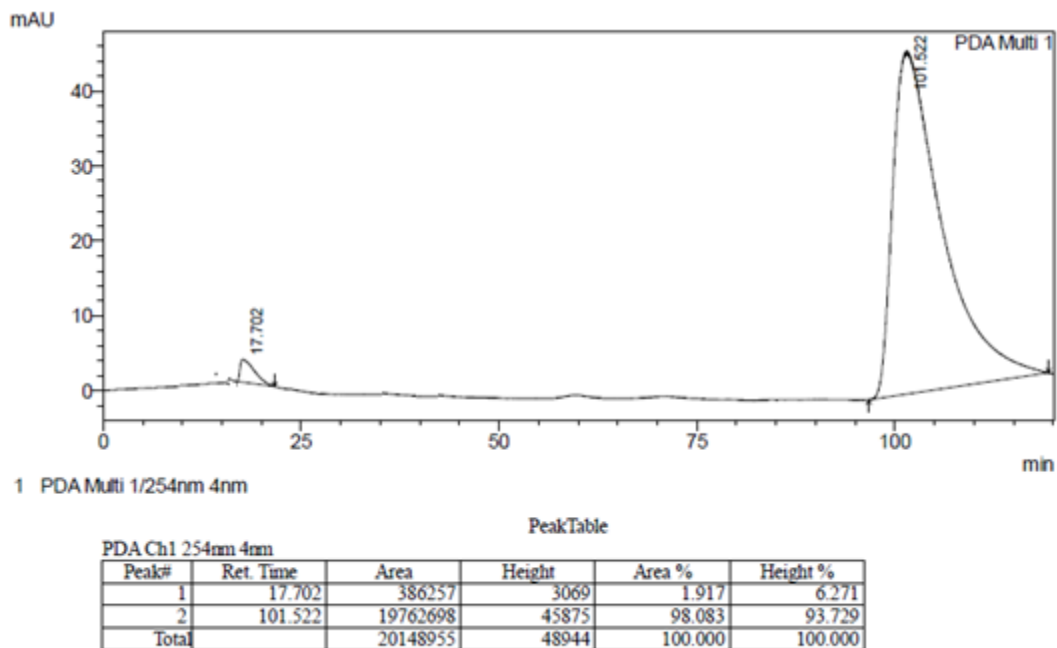

Figure S46. HPLC spectrum of Michael Adduct (5d) in presence of CMPTC (9b) and Toluene/K<sub>2</sub>CO<sub>3</sub> condition.

## Supporting Information

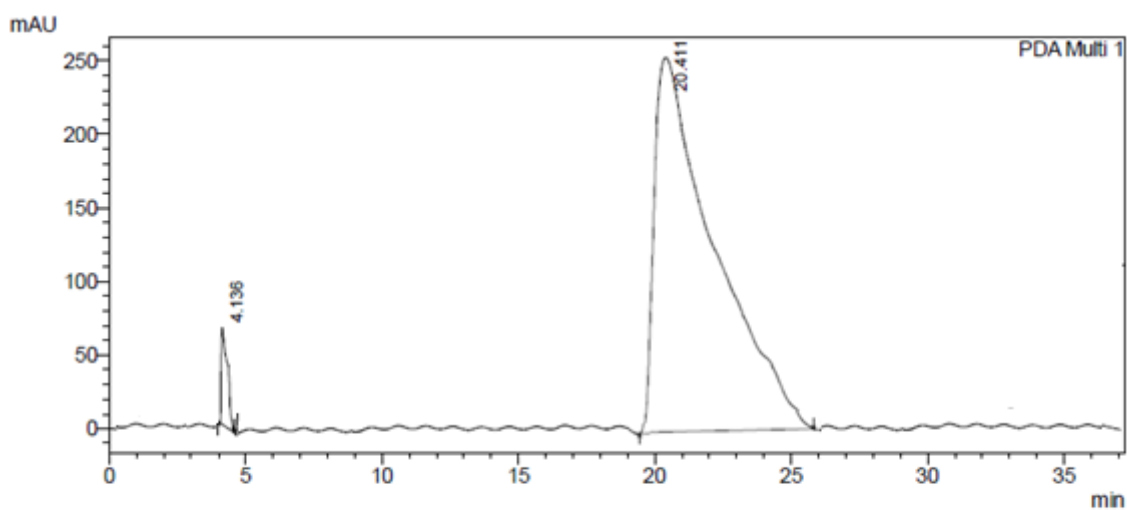

PeakTable

| Peak# | Ret. Time | Area     | Height | Area %  | Height % |
|-------|-----------|----------|--------|---------|----------|
| 1     | 4.136     | 1051451  | 65677  | 5.956   | 25.412   |
| 2     | 20.411    | 16603042 | 192775 | 94.044  | 74.588   |
| Total |           | 17654493 | 258452 | 100.000 | 100.000  |

Figure S47. HPLC spectrum of Michael Adduct (5e) in presence of CMPTC (9a) and Toluene/K<sub>2</sub>CO<sub>3</sub> condition.

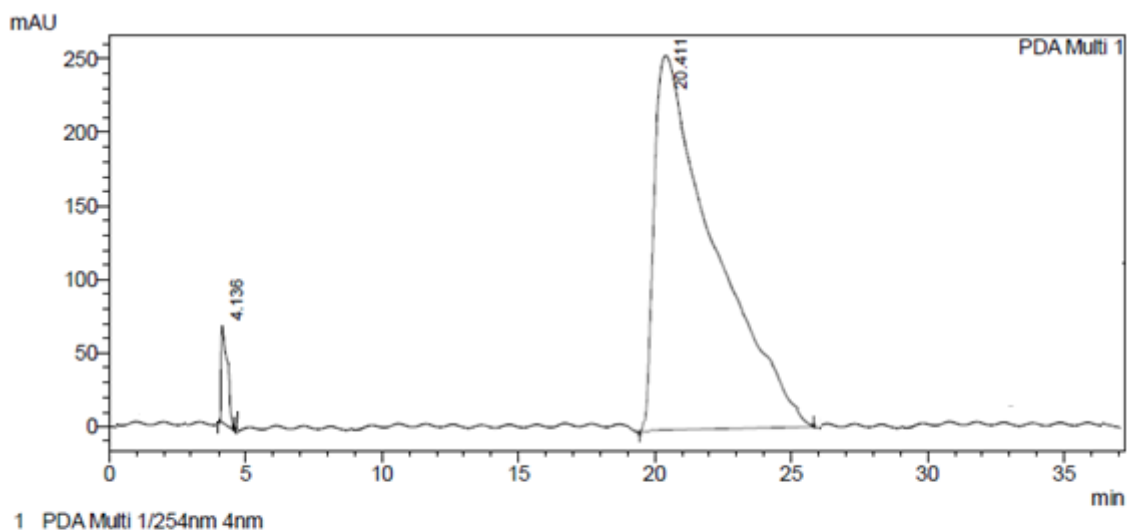

PeakTable

| Peak# | Ret. Time | Area     | Height | Area %  | Height % |
|-------|-----------|----------|--------|---------|----------|
| 1     | 4.136     | 1051451  | 65677  | 5.956   | 25.412   |
| 2     | 20.411    | 16603042 | 192775 | 94.044  | 74.588   |
| Total |           | 17654493 | 258452 | 100.000 | 100.000  |

Figure S48. HPLC spectrum of Michael Adduct (5e) in presence of CMPTC (9b) and Toluene/K<sub>2</sub>CO<sub>3</sub> condition.

Supporting Information

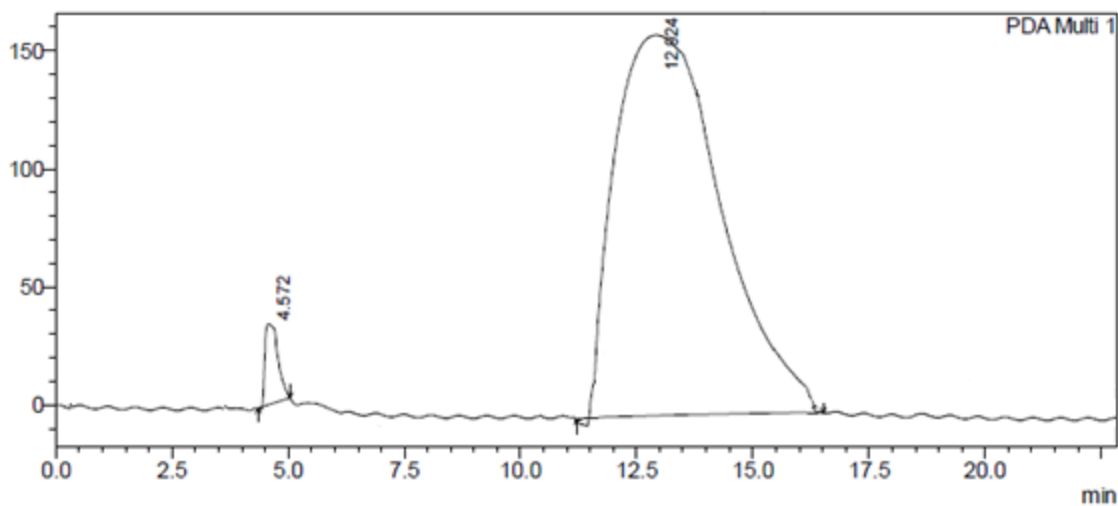

1 PDA Multi 1/254nm 4nm

PeakTable

PDA Ch1 254nm 4nm

| Peak# | Ret. Time | Area    | Height | Area %  | Height % |
|-------|-----------|---------|--------|---------|----------|
| 1     | 4.572     | 654306  | 34050  | 8.476   | 34.542   |
| 2     | 12.924    | 7065168 | 64526  | 91.524  | 65.458   |
| Total |           | 7719474 | 98575  | 100.000 | 100.000  |

Figure S49. HPLC spectrum of Michael Adduct (5f) in presence of CMPTC (9a) and Toluene/K<sub>2</sub>CO<sub>3</sub> condition.

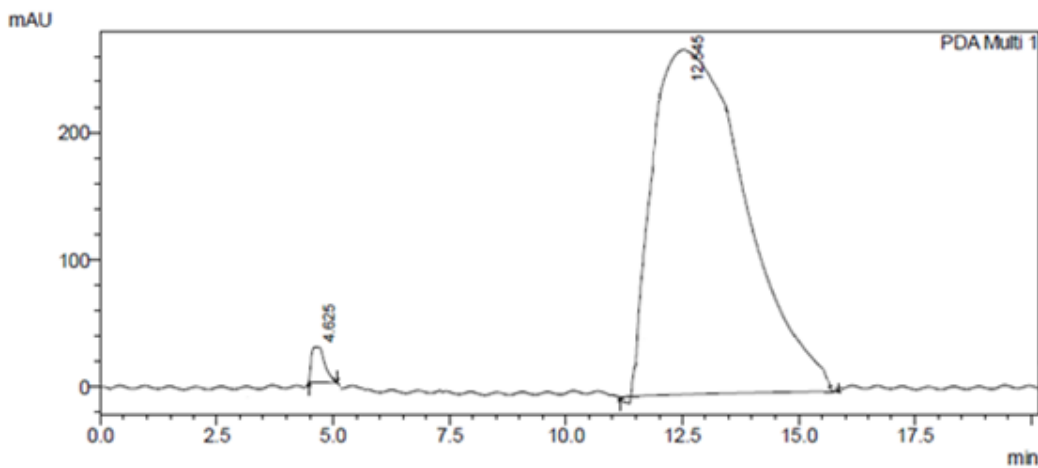

1 PDA Multi 1/254nm 4nm

PeakTable

PDA Ch1 254nm 4nm

| Peak# | Ret. Time | Area     | Height | Area %  | Height % |
|-------|-----------|----------|--------|---------|----------|
| 1     | 4.625     | 549780   | 27787  | 2.727   | 13.368   |
| 2     | 12.545    | 19608700 | 180075 | 97.273  | 86.632   |
| Total |           | 20158479 | 207862 | 100.000 | 100.000  |

Figure S50. HPLC spectrum of Michael Adduct (5f) in presence of CMPTC (9b) and Toluene/K<sub>2</sub>CO<sub>3</sub> condition.

Supporting Information

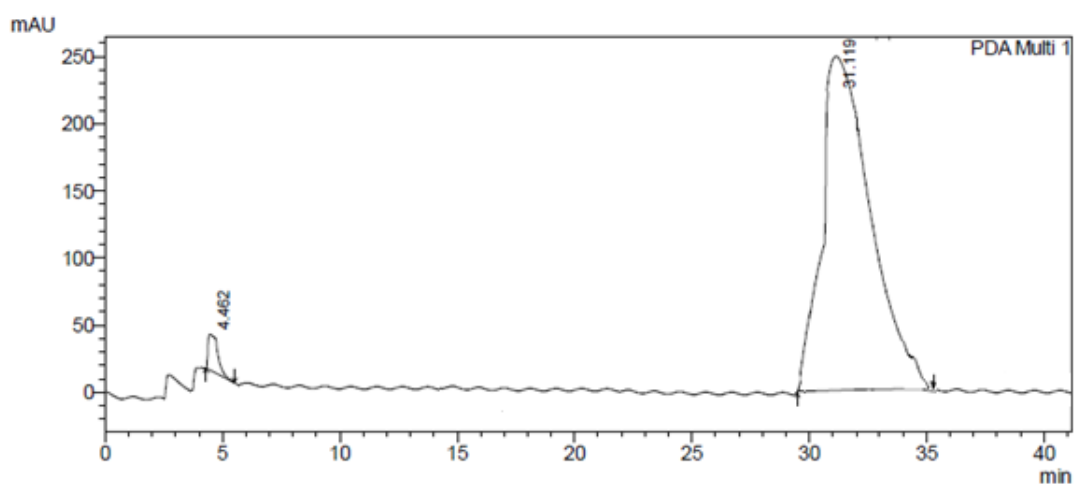

PeakTable

| Peak# | Ret. Time | Area     | Height | Area %  | Height % |
|-------|-----------|----------|--------|---------|----------|
| 1     | 4.462     | 793053   | 26530  | 5.094   | 13.931   |
| 2     | 31.119    | 14774141 | 163910 | 94.906  | 86.069   |
| Total |           | 15567194 | 190441 | 100.000 | 100.000  |

Figure S51. HPLC spectrum of Michael Adduct (5g) in presence of CMPTC (9a) and Toluene/K<sub>2</sub>CO<sub>3</sub> condition.

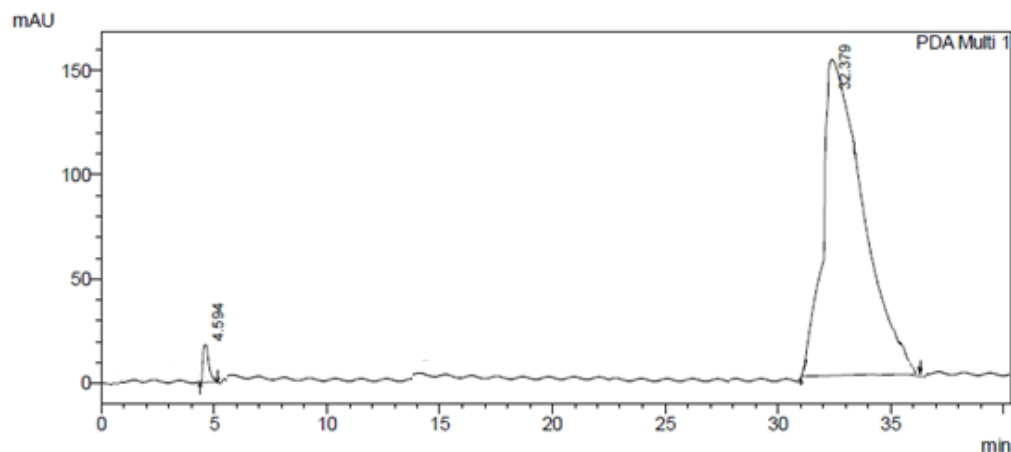

PeakTable

| Peak# | Ret. Time | Area     | Height | Area %  | Height % |
|-------|-----------|----------|--------|---------|----------|
| 1     | 4.594     | 330906   | 18072  | 2.746   | 14.555   |
| 2     | 32.379    | 11717830 | 106092 | 97.254  | 85.445   |
| Total |           | 12048736 | 124164 | 100.000 | 100.000  |

Figure S52. HPLC spectrum of Michael Adduct (5g) in presence of CMPTC (9b) and Toluene/K<sub>2</sub>CO<sub>3</sub> condition.

## Supporting Information

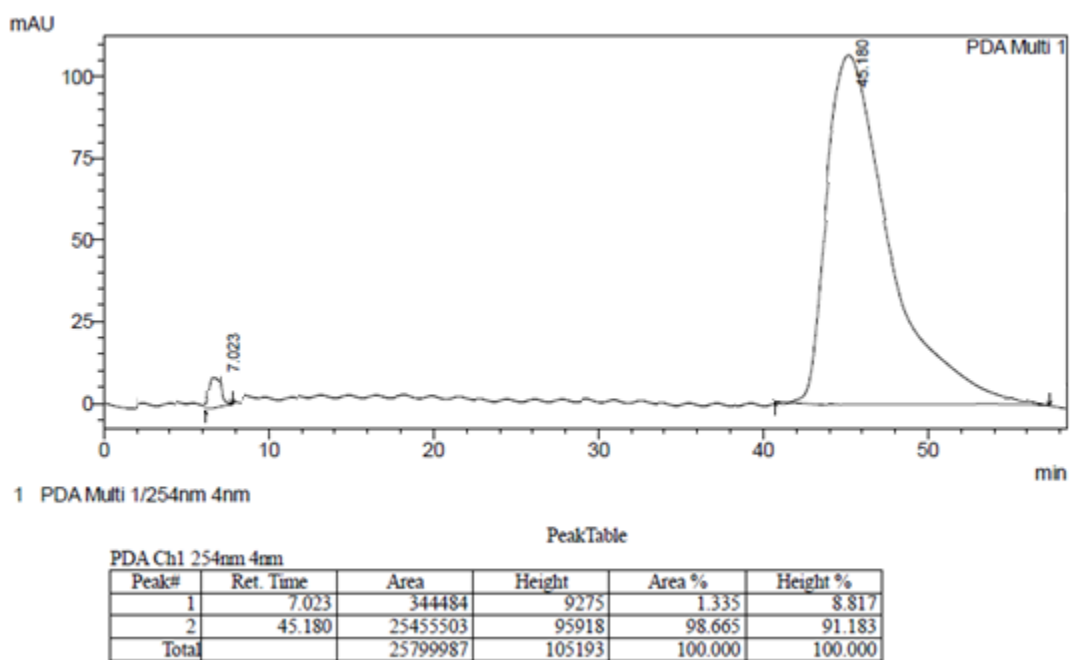

Figure S53. HPLC spectrum of Michael Adduct (5h) in presence of CMPTC (9a) and Toluene/K<sub>2</sub>CO<sub>3</sub> condition.

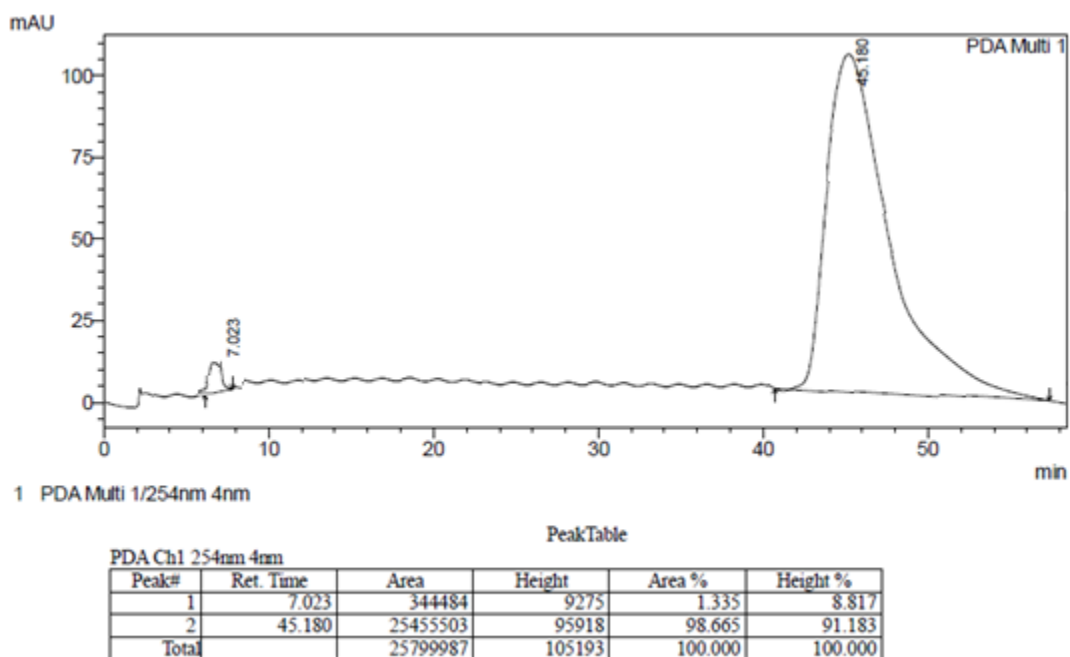

Figure S54. HPLC spectrum of Michael Adduct (5h) in presence of CMPTC (9b) and Toluene/K<sub>2</sub>CO<sub>3</sub> condition.

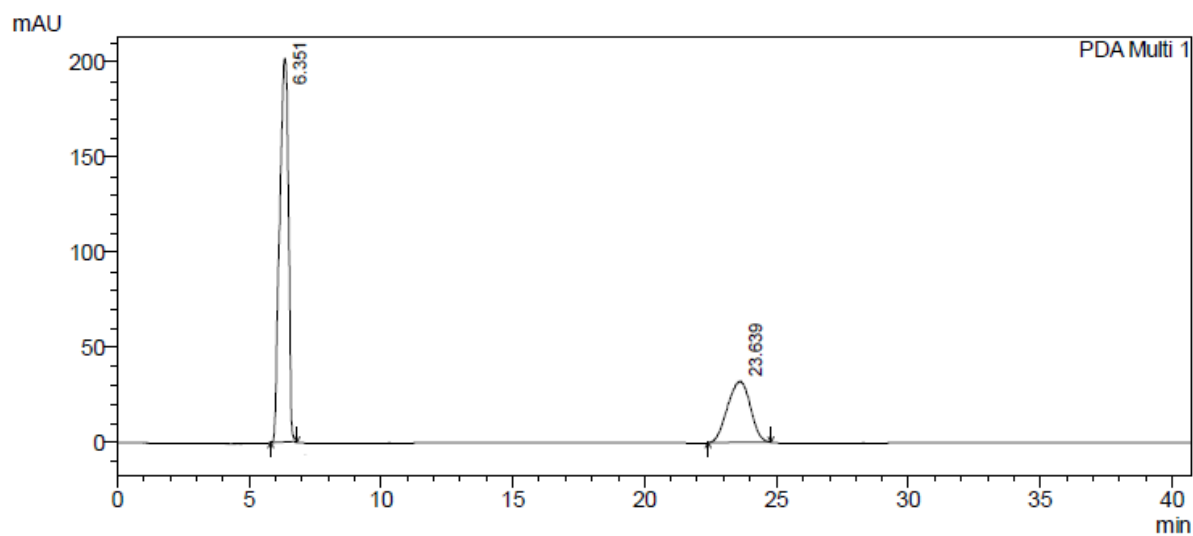

1 PDA Multi 1/254nm 4nm

PeakTable

PDA Ch1 254nm 4nm

| Peak# | Ret. Time | Area    | Height | Area %  | Height % |
|-------|-----------|---------|--------|---------|----------|
| 1     | 6.351     | 4665702 | 201365 | 70.603  | 86.181   |
| 2     | 23.639    | 1942699 | 32287  | 29.397  | 13.819   |
| Total |           | 6608401 | 233652 | 100.000 | 100.000  |

**Figure S55. HPLC spectrum of Michael Adduct (5a) in presence of CMPTC (9b) and Toluene/K<sub>2</sub>CO<sub>3</sub> at room temperature.**
